## ATP activation of peritubular cells drives testicular sperm transport

David Fleck<sup>1‡</sup>, Lina Kenzler<sup>1‡</sup>, Nadine Mundt<sup>1,2</sup>, Martin Strauch<sup>3</sup>, Naofumi Uesaka<sup>1,4</sup>, Robert Moosmann<sup>1</sup>, Felicitas Bruentgens<sup>1†</sup>, Annika Missel<sup>5</sup>, Artur Mayerhofer<sup>5</sup>, Dorit Merhof<sup>3</sup>, Jennifer Spehr<sup>1</sup>, Marc Spehr<sup>1,2\*</sup>

<sup>1</sup> Department of Chemosensation, Institute for Biology II, RWTH Aachen University, D-52074 Aachen, Germany.

<sup>2</sup> Research Training Group 2416 *MultiSenses – MultiScales*, RWTH Aachen University, D-52074 Aachen, Germany

<sup>3</sup> Institute of Imaging and Computer Vision, RWTH Aachen University, D-52074 Aachen, Germany.

<sup>4</sup> Department of Cognitive Neurobiology, Tokyo Medical and Dental University, Tokyo, Japan.

<sup>5</sup> Biomedical Center Munich (BMC), Cell Biology, Anatomy III, Ludwig-Maximilians-Universität München, 82152 Planegg-Martinsried, Germany.

† Present address: Charité-Universitätsmedizin Berlin, Neuroscience Research Center, D-10117 Berlin, Germany.

‡ These authors contributed equally to this work

\* For correspondence: [m.spehr@sensorik.rwth-aachen.de](mailto:m.spehr@sensorik.rwth-aachen.de)

**Abstract** Spermatogenesis, the complex developmental process of male germ cell proliferation, differentiation, and maturation, is the basis of male fertility and reproductive fitness. In the seminiferous tubules of the testes, spermatozoa are constantly generated from spermatogonial stem cells through a stereotyped sequence of mitotic and meiotic divisions. The basic physiological principles, however, that control both maturation and luminal transport of the still immotile spermatozoa within the seminiferous tubules remain poorly, if at all, defined. Here, we show that coordinated contractions of smooth muscle-like testicular peritubular cells provide the propulsive force for luminal sperm transport towards the rete testis and epididymis. Using a mouse model for *in vivo* imaging, we describe and quantify spontaneous tubular contractions and show a causal relationship between peritubular  $Ca^{2+}$  waves and peristaltic transport. Moreover, we identify P2 receptor-dependent purinergic signaling pathways as physiological triggers of tubular contractions both *in vitro* and *in vivo*. When challenged with extracellular ATP, transport of luminal

1 content inside the seminiferous tubules displays stage-dependent directionality. We thus suggest  
2 that paracrine purinergic signaling coordinates peristaltic recurrent contractions of the mouse  
3 seminiferous tubules to propel immotile spermatozoa to the rete testis. Consequently, our findings  
4 could have substantial pharmaceutical implications for both infertility treatment and / or male  
5 contraception.

## 7 Introduction

8 Spermatogenesis ranks among the most complex, yet least understood developmental processes  
9 in postnatal life. Inside the seminiferous tubules, this intricate course of mass cell proliferation and  
10 transformation events generates haploid spermatozoa from diploid spermatogonial stem cells.  
11 Along the seminiferous epithelium, spermatogenesis has been conceptualized by attribution of  
12 sequential cellular ‘stages’, which progress through coordinated cycles (Russell, 1990). Each  
13 spermatogenic cycle completes with the release of immotile spermatozoa from the seminiferous  
14 epithelium into the lumen of the tubule. Once detached from the Sertoli cells, sperm must be  
15 transported to the *rete testis* and epididymis for final maturation. Precisely regulated tubular  
16 transport mechanisms are, thus, imperative for reproduction.

17 While bulk movement of luminal content has been anecdotally reported (Cross, 1958; Setchell et  
18 al., 1978; Worley et al., 1985), no quantitative data on sperm transport within the seminiferous  
19 tubules is available. Early *in vitro* observations of apparent minute undulating motions of  
20 seminiferous tubule segments (Roosen-Runge, 1951; Suvanto and Korman, 1970) suggested  
21 that smooth muscle-like testicular peritubular cells (TPCs) (Clermont, 1958; Ross, 1967) could  
22 mediate contractile tubule movements. This concept has gained widespread support from several,  
23 mostly indirect, *in vitro* studies (Ailenberg et al., 1990; Filippini et al., 1993; Miyake et al., 1986;  
24 Tripiciano et al., 1996). However, quantitative direct (i.e., live cell) measurements of seminiferous  
25 tubule contractions are rare and controversial (Ellis et al., 1978; Harris and Nicholson, 1998;  
26 Losinno et al., 2012; Worley and Leendertz, 1988). Moreover, mechanistic *in vivo* evidence is  
27 lacking. Here, we demonstrate that, by acting on ionotropic and metabotropic P2 receptors,  
28 extracellular ATP activates TPC contractions that trigger directional sperm movement within the  
29 seminiferous tubules both *in vitro* and *in vivo*.

## 1 Results

### 2 ATP is a potent TPC stimulus

3 Accumulating data suggests that purinergic signaling constitutes a critical component of testicular  
4 paracrine communication (Fleck *et al.*, 2016; Foresta *et al.*, 1995; Gelain *et al.*, 2003; Poletto  
5 Chaves *et al.*, 2006; Veitinger *et al.*, 2011a; Walenta *et al.*, 2018), with Sertoli cells acting as a  
6 primary source of ATP secretion (Gelain *et al.*, 2005). Therefore, we asked if mouse TPCs are  
7 sensitive to extracellular ATP. Primary TPC cultures retain high purity for  $\geq 14$  days *in vitro* (Figure  
8 1A, and Figure 1–figure supplement 1A&B) and cells express transcripts for several ionotropic  
9 (P2X2, P2X4, P2X7) and metabotropic (P2Y2, P2Y6) purinoceptors (Figure 1B). The specific  
10 biophysical and pharmacological profile of ATP-dependent transmembrane currents – i.e.,  
11 saturation at  $\leq 100$   $\mu\text{M}$  ATP, modest but persistent desensitization, reduced BzATP sensitivity  
12 (data not shown), potentiation by ivermectin, and inhibition by suramin (Figure 1C–G) – strongly  
13 suggests functional expression of P2X2 and / or P2X4, but not P2X7 receptors (Coddou *et al.*,  
14 2011). Notably,  $\sim 46\%$  of all ATP-sensitive TPCs additionally displayed a delayed, but long-lasting  
15 inward current that gradually developed over tens of seconds after ATP stimulation ended (Figure  
16 1–figure supplement 1C&D). Also activated by UTP, dependent on presence of intracellular GTP,  
17 and largely carried by  $\text{Cl}^-$  (Figure 1–figure supplement 1E–H), this current likely results from P2Y  
18 receptor-mediated phosphoinositide turnover,  $\text{Ca}^{2+}$  release, and activation of  $\text{Ca}^{2+}$ -gated  $\text{Cl}^-$   
19 channels. Notably, live-cell ratiometric  $\text{Ca}^{2+}$  imaging in TPCs revealed robust and repetitive  
20 cytosolic  $\text{Ca}^{2+}$  transients upon ATP exposure (Figure 1H&I). Reducing extracellular  $\text{Ca}^{2+}$  to 100  
21 nM, a concentration approximately equimolar to cytosolic levels, did substantially reduce, but not  
22 abolish ATP response amplitudes (Figure 1J&K). The selective P2Y receptor agonist UTP also  
23 triggered  $\text{Ca}^{2+}$  signals (data not shown). Together, these data suggest that mouse TPCs  
24 functionally express both ionotropic and metabotropic purinoceptors.

25 Next, we asked if TPCs also exhibit ATP sensitivity in their physiological setting. In parallel  
26 approaches, we examined purinergic  $\text{Ca}^{2+}$  signals from mouse TPCs in acute seminiferous tubule  
27 sections (Fleck *et al.*, 2016), using either TPC-specific expression of genetically encoded  $\text{Ca}^{2+}$   
28 indicators (GCaMP6f) or bulk loading with a synthetic  $\text{Ca}^{2+}$  sensor (fura-2). First, we confirmed  
29 inducible smooth muscle-targeted testicular expression of fluorescent reporter proteins in  
30 SMMHC-CreER<sup>T2</sup> x Ai14D mice (Figure 2A–C, movie S1). Second, TPC-specific GCaMP6f

1 expression in SMMHC-CreER<sup>T2</sup> x Ai95D mice revealed robust Ca<sup>2+</sup> transients in cells of the tubular  
 2 wall upon ATP exposure (Figure 2D&E). Third, fura-2/AM loading of intact seminiferous tubule  
 3 sections preferentially labelled the outermost cell layer (Figure 2F), allowing semi-quantitative *in*  
 4 *situ* imaging of ATP-dependent Ca<sup>2+</sup> signals in mouse TPCs (Figure 2G&H). So far, our results  
 5 thus demonstrate that challenging TPCs with extracellular ATP triggers robust Ca<sup>2+</sup> signals both  
 6 *in vitro* and *in situ*.

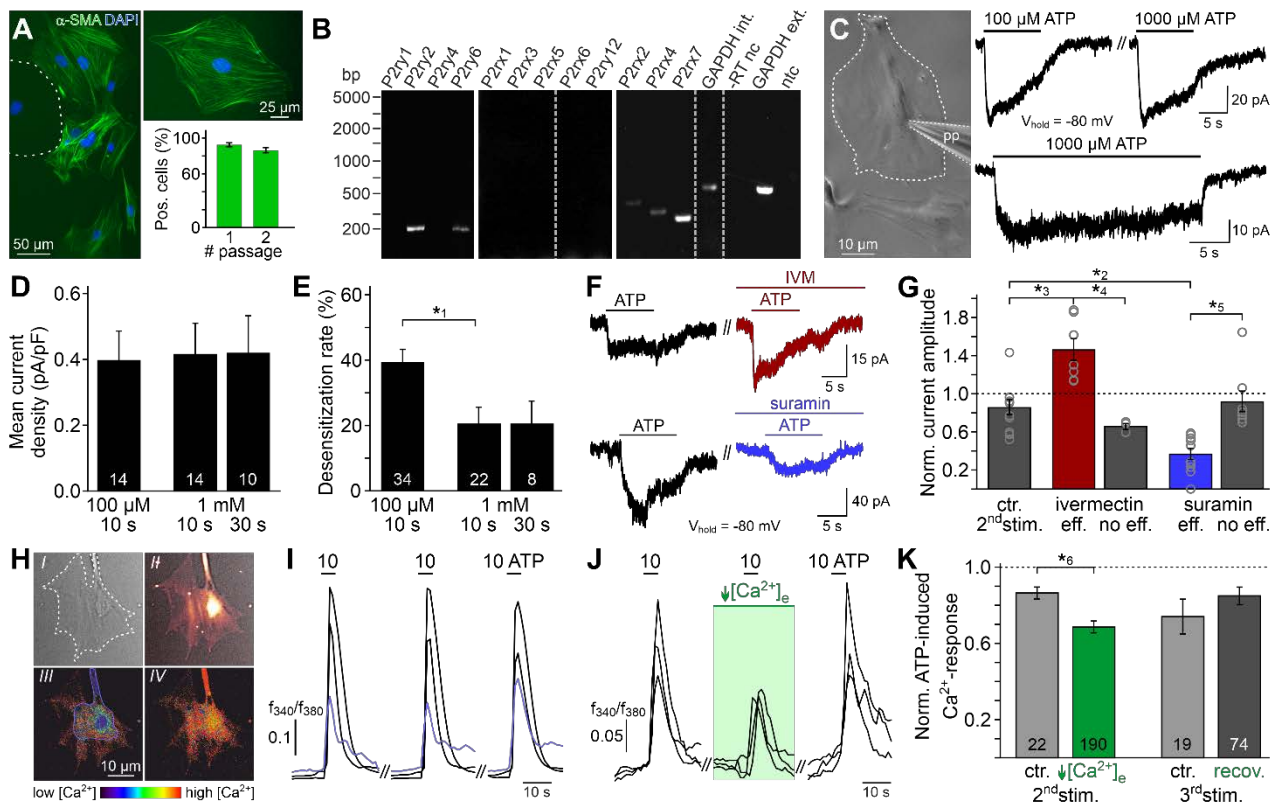

7 **Figure 1 | ATP is a potent TPC stimulus.** (A) Immunostaining against  $\alpha$ -smooth muscle actin ( $\alpha$ -SMA, green) marks TPCs *in vitro* (Tung and Fritz, 1990). Cell count is determined by nuclear staining (DAPI, blue). Cultures retain high TPC purity for at least two passages ( $92 \pm 2\%$ ,  $n = 1102$  (#1);  $86 \pm 3\%$ ,  $n = 542$  (#2)). Dashed line delimits one of the few  $\alpha$ -SMA-negative cells. (B) RT-PCR profiling of purinoceptor isoforms in TPC cultures reveals P2rx2, P2rx4, P2rx7, P2ry2, and P2ry6 transcripts. Dashed grey vertical lines indicate cuts in a given gel. (C-G) ATP exposure triggers TPC transmembrane currents. (C) Phase-contrast micrograph depicting a TPC (dashed line) targeted by a patch pipette (pp). Original whole-cell recordings illustrate representative currents in response to ATP stimulation ( $100 \mu\text{M}$  versus  $1000 \mu\text{M}$  and  $10 \text{ s}$  versus  $30 \text{ s}$ , respectively). (D, E) Quantification (bar charts; mean  $\pm$  SEM;  $n$  as indicated) reveals saturation of peak current density at  $\leq 100 \mu\text{M}$  ATP (D) and modest desensitization at a concentration-dependent rate (E). (F) Whole-cell voltage-clamp recordings show ATP-induced currents ( $100 \mu\text{M}$ ;  $10 \text{ s}$ ) that are potentiated by ivermectin ( $3 \mu\text{M}$ ) and partially inhibited by suramin ( $100 \mu\text{M}$ ), respectively ( $\geq 60 \text{ s}$  preincubation). (G) Quantification (bar charts; mean  $\pm$  SEM; data normalized to initial control response) demonstrates

1 dichotomy in drug sensitivity. **(H-K)** ATP-dependent  $\text{Ca}^{2+}$  mobilization in cultured TPCs.  $\text{Ca}^{2+}$  transients in  
 2 response to repetitive stimulation (10  $\mu\text{M}$ , 10 s) are monitored by ratiometric (fura-2) fluorescence imaging.  
 3 **(H)** Phase contrast **(I)** and merged fluorescence ( $f_{380}$ ; **II**) images of a TPC *in vitro*. Bottom pseudocolor  
 4 frames (rainbow 256 colour map) illustrate relative cytosolic  $\text{Ca}^{2+}$  concentration ( $[\text{Ca}^{2+}]_c$ ) before **(III)** and  
 5 during **(IV)** ATP stimulation. **(I, J)** Representative original traces from time-lapse fluorescence ratio ( $f_{340}/f_{380}$ )  
 6 recordings depict repetitive  $[\text{Ca}^{2+}]_c$  elevations upon ATP exposure under control conditions **(I)** blue traces  
 7 correspond to the TPC in **(H)** and during reduced extracellular  $\text{Ca}^{2+}$  concentration **(J)**  $[\text{Ca}^{2+}]_e = 100 \text{ nM}$ ; 60  
 8 s preincubation). **(K)** Bar chart depicting  $[\text{Ca}^{2+}]_c$  signal amplitudes (mean  $\pm$  SEM; n as indicated) –  
 9 normalized to the initial ATP response – under control conditions (grey) *versus* low  $[\text{Ca}^{2+}]_e$  (green). Asterisks  
 10 denote statistically significant differences (\* $1p = 0.001$ ; \* $2p = 0.002$ ; \* $3p = 5.5e^{-5}$ ; \* $4p = 0.0006$ ; \* $5p = 0.02$ ; \* $6p$   
 11  $= 0.02$ ; Student *t*-test **(E, K)**, one-way ANOVA **(G)**).  
 12  
 13

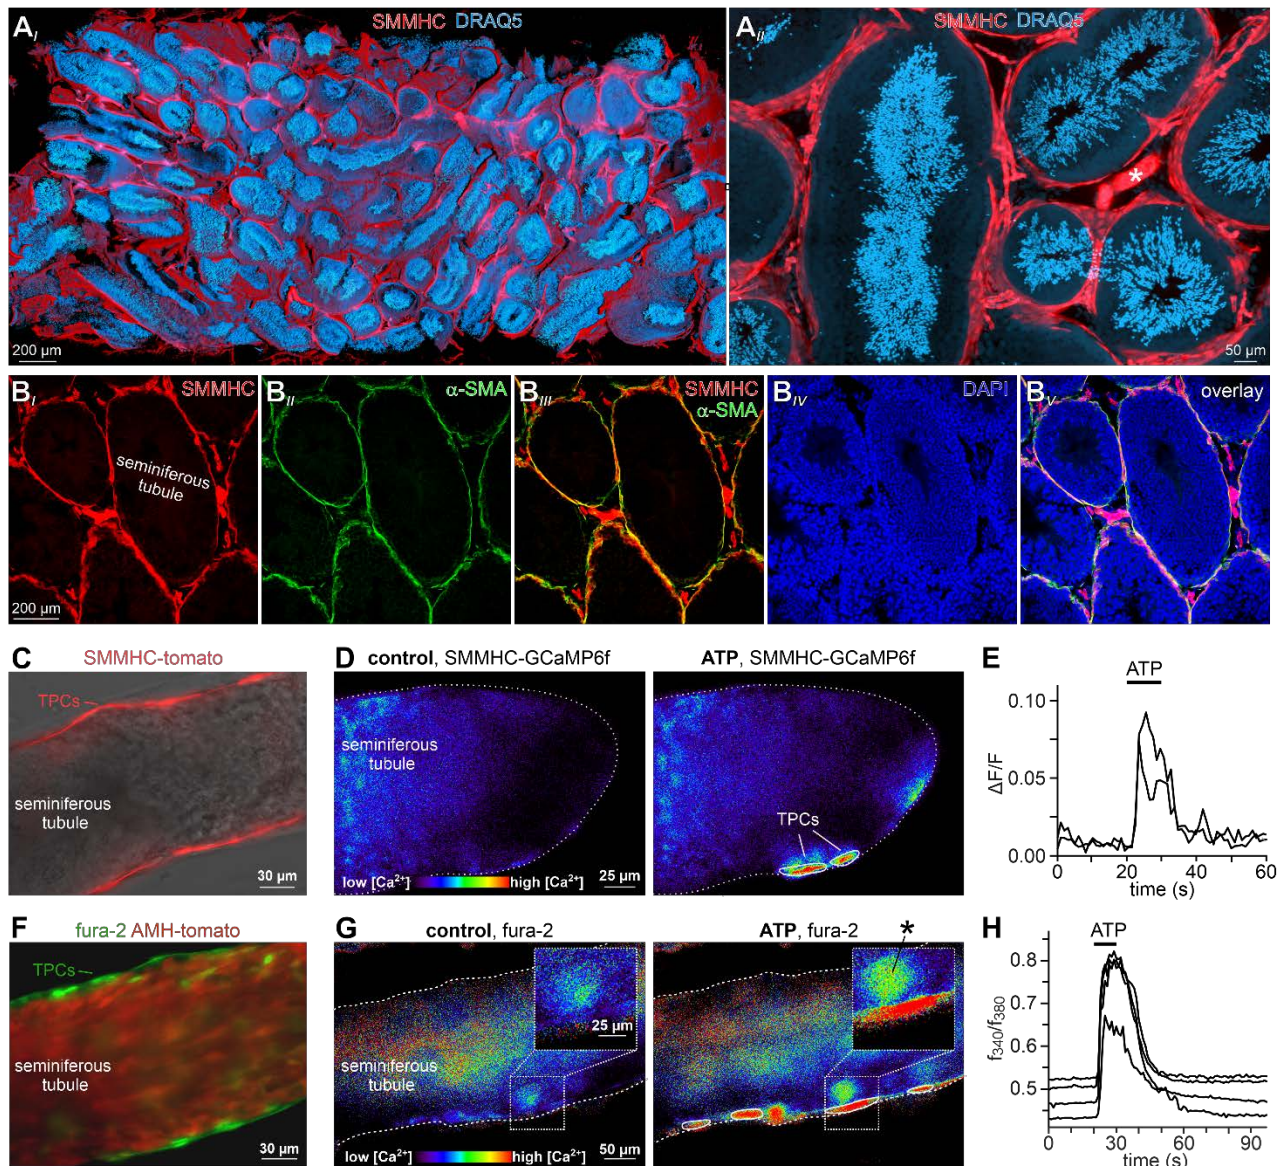

1 **Figure 2: ATP triggers TPC  $\text{Ca}^{2+}$  signals in acute seminiferous tubule sections.** (A) 3D reconstruction  
2 of an intact 6 x 3 x 1.5 mm testis sample from a SMMHC-CreER<sup>T2</sup> x Ai14D mouse after tissue clearing  
3 (CLARITY (Chung and Deisseroth, 2013)) reveals tdTomato expression (red) restricted to TPCs and  
4 endothelial cells (asterisk in (A<sub>ii</sub>)). Nuclear staining (DRAQ5; blue) prominently labels condensed DNA in  
5 post-meiotic germ cells. (B) SMMHC-CreER<sup>T2</sup>-expressing cells in the tubule wall are TPCs. In testis  
6 cryosections from adult SMMHC-CreER<sup>T2</sup> x Ai14D mice, Cre-driven tdTomato signals (B<sub>i</sub>) and  $\alpha$ -SMA  
7 immunostaining (B<sub>ii</sub>) colocalize at tubular margins (B<sub>iii</sub>). Note that endothelial vasculature in interstitial  
8 regions is  $\alpha$ -SMA-negative (B<sub>v</sub>). (C–H) Both TPC-specific expression of a genetically encoded  $\text{Ca}^{2+}$  indicator  
9 (GCaMP6f) and bulk loading with a synthetic  $\text{Ca}^{2+}$  sensor (fura-2) allow for TPC-selective live cell  $\text{Ca}^{2+}$   
10 imaging in acute seminiferous tubule sections. (C) Merged fluorescence and reflected light micrographs  
11 show the location of SMMHC-expressing TPCs (red) within the wall of an intact tubule. (D–E) Cre-dependent  
12 GCaMP6f expression in SMMHC-CreER<sup>T2</sup> x Ai95D mice reveals  $\text{Ca}^{2+}$  transients in TPCs in response to  
13 ATP. Representative fluorescence images ((D) rainbow 256 colour map) before and during ATP exposure  
14 (100  $\mu\text{M}$ ; 10 s), and corresponding traces (E) showing changes in GCaMP6f intensity ( $\Delta\text{F}/\text{F}$ ) over time.  
15 Traces from ROIs outlined in (D) (white solid lines). (F) Merged fluorescence image of an acute seminiferous  
16 tubule section from an AMH-Cre x Ai14D mouse after bulk loading with fura-2/AM (green). Anti-Müllerian  
17 hormone (AMH) dependent expression of tdTomato (red) specifically labels Sertoli cells that build the  
18 seminiferous epithelium. Note the narrow green band of marginal TPCs that are preferentially labelled by  
19 the  $\text{Ca}^{2+}$ -sensitive dye. (G–H) Ratiometric  $\text{Ca}^{2+}$  imaging in fura-2-loaded tubules enables semi-quantitative  
20 live-cell monitoring of TPC activity. Representative fluorescence images ((G) rainbow 256 colour map)  
21 before and during ATP exposure (100  $\mu\text{M}$ ; 10 s). Corresponding traces (H) show the integrated fluorescence  
22 intensity ratio ( $f_{340}/f_{380}$ ) from four ROIs (in (G); white solid lines) over time. Inset (G) shows a putative TPC  
23 and an adjacent putative spermatogonium (asterisk) at higher magnification.  
24

## 25 **ATP triggers seminiferous tubule contractions**

26 We hypothesized that ATP-induced  $\text{Ca}^{2+}$  signals in TPCs could mediate contractile motion of the  
27 seminiferous tubule. To address this, we established a fast, quasi-simultaneous image acquisition  
28 method that enables parallel recording of both peritubular  $\text{Ca}^{2+}$  responses and seminiferous tubule  
29 movement (methods). Brief ATP exposure resulted in a peripheral band of  $\text{Ca}^{2+}$  activity at the edge  
30 of the tubule. Such signals usually coincided with a pronounced contractile motion of the  
31 seminiferous tubule (Figure 3A, movie S2). When movement is quantified as the time-lapse image  
32 flow field strength (methods) tubular contraction follows the  $\text{Ca}^{2+}$  signal onset with minimal delay,  
33 outlasts the  $\text{Ca}^{2+}$  signal peak, and recovers slowly (Figure 3B). Both  $\text{Ca}^{2+}$  responses and tubular  
34 movement are dose-dependent and share an ATP threshold concentration of approximately 1  $\mu\text{M}$   
35 (Figure 3C–E, movie S3). Notably, in some tubules, we observed spontaneous low-amplitude

1 ‘vibratory’ movements and local indentations (Figure 4A), reminiscent of the relatively high  
 2 frequency rippling previously described (Ellis *et al.*, 1981; Worley *et al.*, 1985).

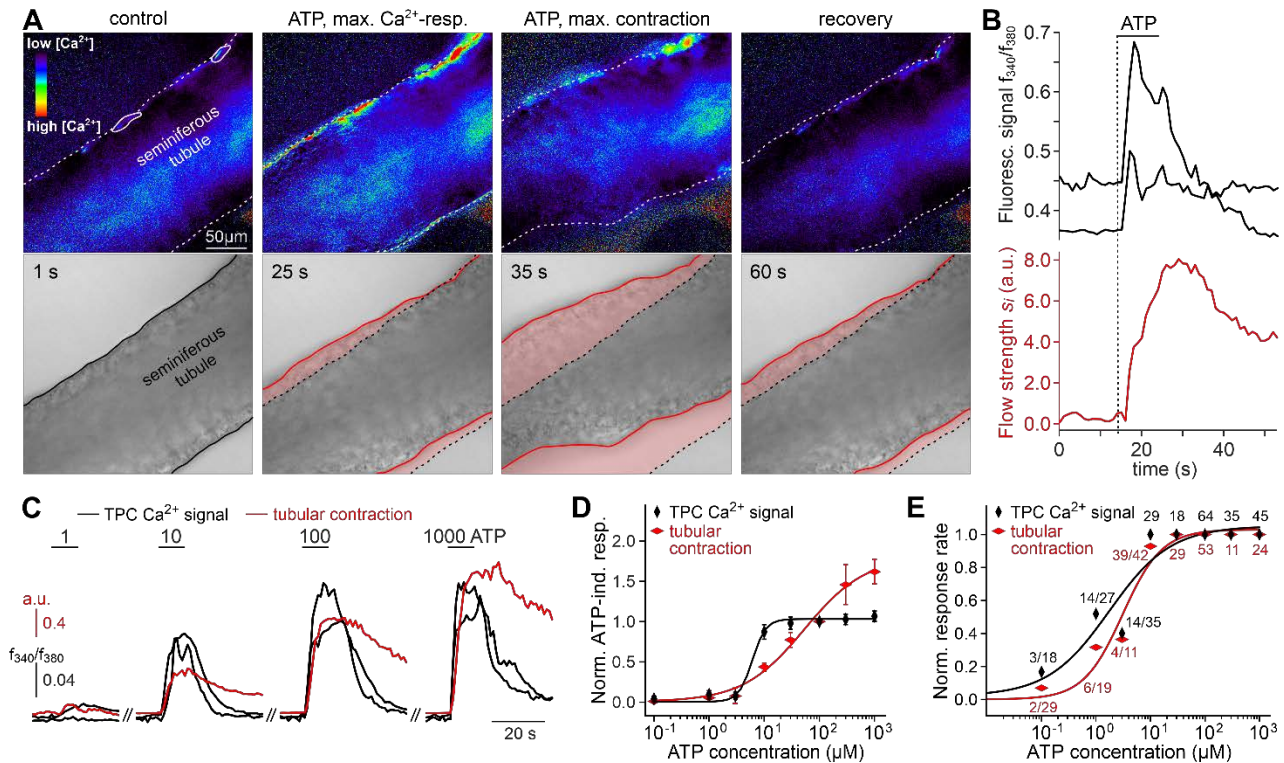

3 **Figure 3 | ATP triggers seminiferous tubule contractions.** (A) Quasi-simultaneous imaging of [Ca<sup>2+</sup>]<sub>c</sub>-  
 4 dependent fluorescence (top;  $f_{340}/f_{380}$ ; rainbow 256 colour map) and tubular position (bottom; reflected light  
 5 microscopy). Focus adjusted to provide sharp images of the seminiferous tubule’s edges. Individual frames  
 6 correspond to the time points indicated, i.e. before, during, and after ATP exposure (see (B)). Dashed white  
 7 lines (top) and corresponding solid black / red lines (bottom) depict the outline of the tubule in each image,  
 8 respectively. Dotted black lines (bottom) show the contour at  $t = 1$  s for comparison. Pink shades (bottom)  
 9 accentuate areas that moved. (B) Integrated fluorescence ratio (top; black traces correspond to regions-of-  
 10 interest delimited by solid white lines in (A)) and integrated flow strength  $s_i$  (bottom; red trace) over time.  
 11 ATP (100 μM) stimulation as indicated (horizontal bar). With the  $t = 0$  s image as reference, flow strength  $s_i$   
 12 is calculated by custom code as the average whole tubule pixel shift vector (methods). Dashed vertical line  
 13 marks the Ca<sup>2+</sup> signal onset. (C–E) Ca<sup>2+</sup> responses and tubular movement are dose-dependent. (C) Original  
 14 traces depict [Ca<sup>2+</sup>]<sub>c</sub> (black) and tubule movement (red) from a representative experiment. Data calculated  
 15 as in (B). Brief (10 s) stimulations with increasing ATP concentrations (1–1000 μM) trigger dose-dependent  
 16 Ca<sup>2+</sup> transients and corresponding contractions. (D, E) Data quantification. Dose-response curves illustrate  
 17 peak signals (D) and the percentage of responding cells / tubules (E). Data are normalized to response to  
 18 100 μM ATP (n as indicated in (E)).

19

1 We next investigated the Ca<sup>2+</sup> signaling mechanism(s) underlying ATP-dependent TPC  
2 contractions. First, we asked whether influx of external Ca<sup>2+</sup> is involved in TPC force generation.  
3 Similar to *in vitro* observations (Figure 1J&K), diminishing or even reversing the driving force for  
4 transmembrane Ca<sup>2+</sup> flux by reducing the extracellular Ca<sup>2+</sup> concentration to 100 nM or 12 nM,  
5 respectively, for variable durations, significantly decreased both TPC Ca<sup>2+</sup> signals and tubular  
6 contractions (Figure 4B–H). These effects were fully reversible. Second, we examined a potential  
7 role of ATP-induced Ca<sup>2+</sup> release from internal storage organelles. Ca<sup>2+</sup> depletion of the  
8 sarcoplasmic reticulum via pharmacological inhibition of the sarco / endoplasmic reticulum Ca<sup>2+</sup>-  
9 ATPase essentially abolished both ATP-dependent Ca<sup>2+</sup> signals and contractions (Figure 4D).  
10 Importantly, all results from ratiometric fura-2 imaging were qualitatively indistinguishable from  
11 those obtained with genetically targeted GCaMP6f (Figure 4E–G). Third, we aimed to quantify the  
12 specific contribution of metabotropic purinoceptors to the overall ATP-mediated effect. The P2Y  
13 receptor-selective agonist UTP evoked both TPC Ca<sup>2+</sup> signals and tubular contractions (Figure  
14 4E&F). However, these responses were substantially reduced compared to control ATP  
15 stimulations (Figure 4F), similar to the diminished signals observed under low extracellular Ca<sup>2+</sup>  
16 conditions.

17 Together, these data strongly suggest that (i) extracellular ATP acts as a potent TPC stimulus that  
18 triggers seminiferous tubule contractions *in situ*, that (ii) both P2X and P2Y receptors mediate TPC  
19 responses to ATP exposure, that (iii) Ca<sup>2+</sup> mobilization from the sarcoplasmic reticulum is  
20 necessary to evoke TPC responses, and consequently that (iv) influx of external Ca<sup>2+</sup> via  
21 ionotropic P2X receptors is not sufficient to drive TPC signals and evoke contractions. Notably,  
22 our general finding of ATP-induced mouse TPC contractions is likely transferable to human  
23 peritubular cells. When primary human TPC cultures (Walenta et al., 2018) were exposed to  
24 extracellular ATP, morphological changes were observed within seconds-to-minutes (Figure 4–  
25 figure supplement 1A&B). Moreover, embedding cells in collagen gel lattices revealed  
26 considerable contractile force in response to ATP (Figure 4–figure supplement 1C&D).

27



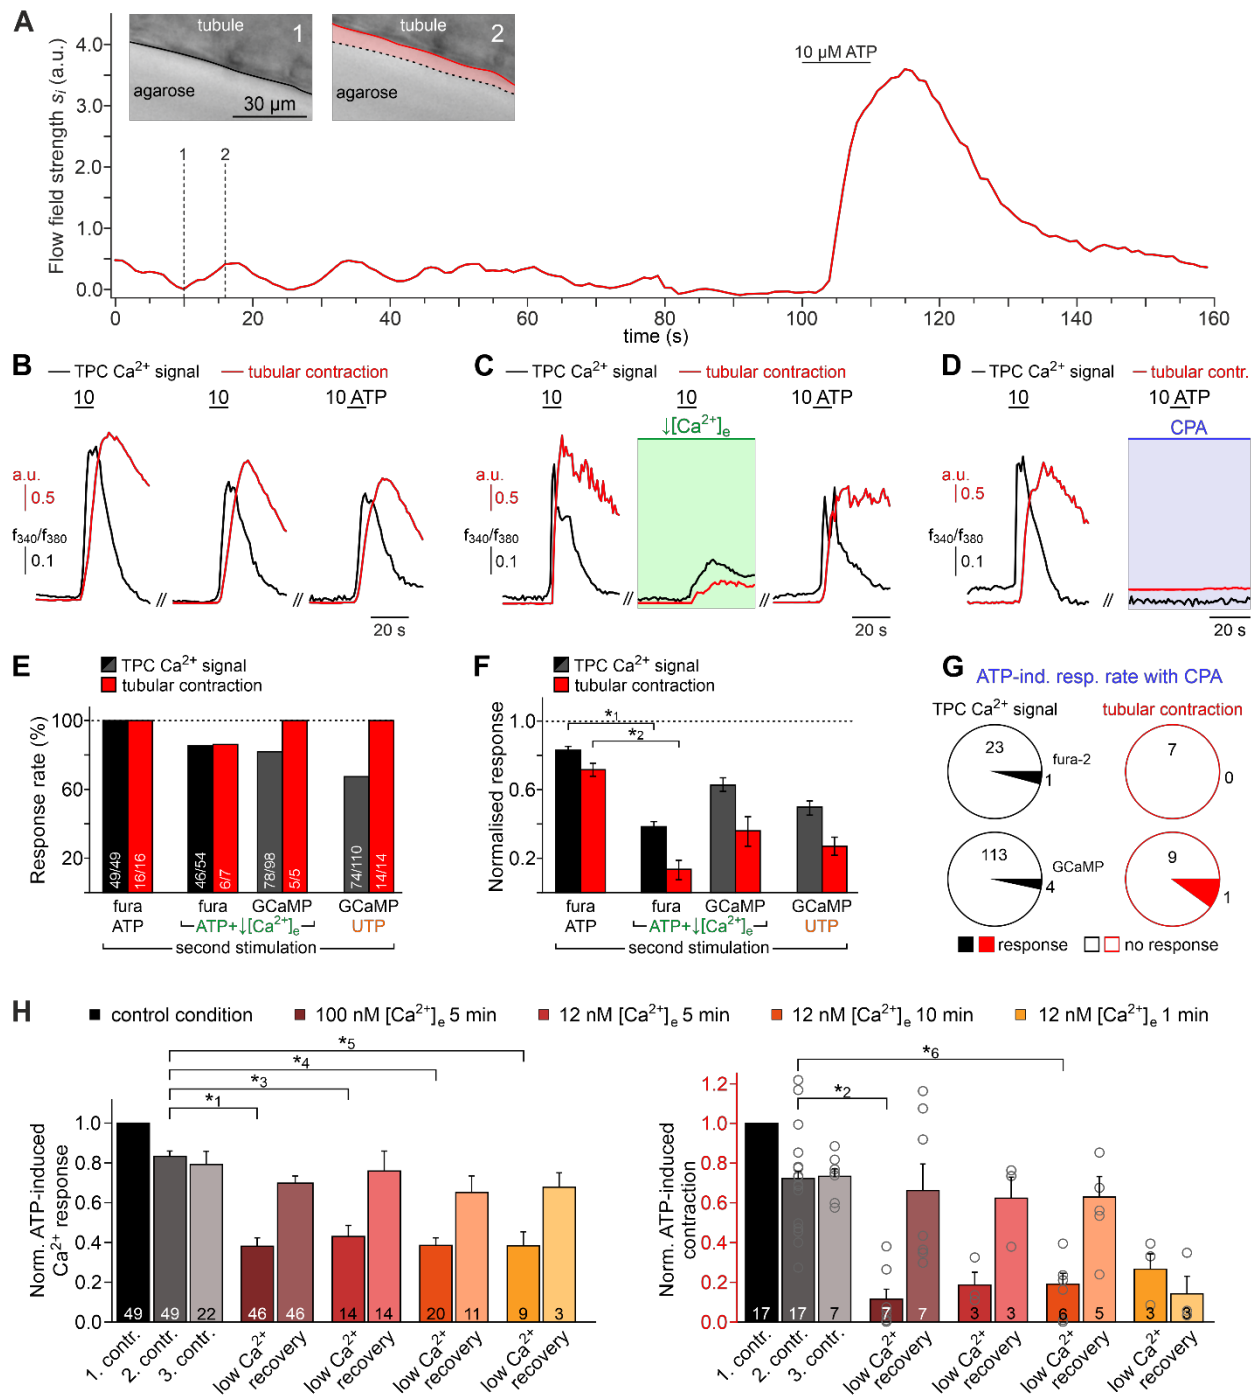

**Figure 4: Both intra- and extracellular  $\text{Ca}^{2+}$  sources contribute to ATP-dependent TPC contractions.**

(A) *In situ* imaging identifies spontaneous low-amplitude ‘vibratory’ movements in acute seminiferous tubule slices. Representative trace illustrating flow field strength analysis of tubular motion under control conditions and upon ATP exposure (10  $\mu$ M; 10 s). Note that spontaneous indentations share small amplitudes and are restricted to the tubule edge (inset). Black / red lines (inset) depict the outline of the tubule in each image, respectively. Dotted black lines show the contour at  $t = 1$  for comparison. Pink shades accentuate areas that moved. (B) Repeated purinergic stimulation triggers robust  $\text{Ca}^{2+}$  elevations and concurring seminiferous

1 tubule contractions with only minor response adaptation. Traces depict changes in fura-2 intensity ratio  
2 ( $f_{340}/f_{380}$ ; black) or tubular movement (red) upon brief ATP exposure (10 s; 10  $\mu$ M; 5 min intervals) under  
3 control conditions. (C) Reducing  $[Ca^{2+}]_e$  (100 nM; 5 min incubation) strongly diminishes responses to ATP  
4 (10 s; 10  $\mu$ M). (D) Depletion of internal  $Ca^{2+}$  stores (CPA (Seidler *et al.*, 1989); 90  $\mu$ M;  $\geq$ 15 min incubation)  
5 essentially abolishes both  $Ca^{2+}$  signals and tubule contractions. (E–G) Quantification of data exemplified in  
6 (B–D). (E) Bar chart depicting ATP sensitivity (response rate; %), independent of signal strength.  
7 Occurrence of  $Ca^{2+}$  elevations (black) and tubule contractions (red) are plotted for different experimental  
8 conditions [i.e., stimulation with ATP or UTP, regular or reduced  $[Ca^{2+}]_e$  (1 mM or 100 nM, respectively), and  
9  $Ca^{2+}$  indicator (fura-2 or GCaMP6f, respectively)]. Numbers of experiments are indicated in each bar. (F)  
10 Signal amplitudes ( $Ca^{2+}$ , black; contractions, red) of responding TPCs / tubules. Data (mean  $\pm$  SEM) are  
11 normalized to the respective initial response under control conditions (dotted horizontal line). Experimental  
12 conditions and numbers of experiments as in (E). Asterisks denote statistical significance ( $*^1p = 2.2e^{-19}$  and  
13  $*^2p = 5.6e^{-8}$ ; *t*-test; note: tests only performed when  $n > 5$  and only one variable was changed). (G) Pie  
14 charts illustrating the profoundly reduced ATP sensitivity of TPCs / tubules after depletion of  $Ca^{2+}$  storage  
15 organelles (CPA; 90  $\mu$ M;  $\geq$ 15 min incubation). (H) Effects of lowering  $[Ca^{2+}]_e$  are comparable over both  
16 incubation periods and concentrations in the nanomolar range. Significantly reduced, though not abolished  
17 TPC  $Ca^{2+}$  signals (left) and seminiferous tubule contractions (right) are observed in presence of both 100  
18 nM and 12 nM  $[Ca^{2+}]_e$  as well as for variable incubation periods lasting between 1 and 10 min, respectively.  
19 Asterisks denote statistical significance ( $*^3p = 2.8e^{-10}$ ,  $*^4p = 7.8e^{-14}$ ,  $*^5p = 3.8e^{-9}$ ,  $*^6p = 1.0e^{-6}$ ; one-way  
20 ANOVA with *post-hoc* Tukey HSD test; note: tests only performed when  $n \geq 5$ ).  
21

## 22 23 **ATP drives directional luminal transport**

24 We hypothesized that ATP-induced tubular contractions could impact the transport of luminal fluid  
25 and spermatozoa. To test this, we custom-built a whole-mount macroscopic imaging platform,  
26 designed to allow both widefield and fluorescence time-lapse imaging of intact seminiferous  
27 tubules (Figure 5A). In addition, this setup enables visual categorization of the twelve seminiferous  
28 epithelium cycle stages into three distinct stage groups (Hess and De Franca, 2008) and allows  
29 precisely timed focal perfusion (methods). First, we asked if brief focal purinergic stimulation  
30 triggers seminiferous tubule contractions and, consequently, luminal content movement. Flow field  
31 change analysis reveals some basal luminal motion independent of mechanical stimulation  
32 (Figure 5B). However, ATP exposure triggered a strong increase in luminal flow field strength that  
33 outlasted the presence of ATP for several tens of seconds (Figure 5B, movie S4). Second, we  
34 analyzed if luminal movement depends on the tubule's cycle stage and, consequently, luminal  
35 sperm count. When we compared ATP-induced movement between directly stimulated stages  
36 (i.e., region-of-interest (ROI) 0) with a high (group II) *versus* a relatively low (groups I & III) amount  
37 of luminal sperm, we observed no difference in stimulation-dependent motion (Figure 5C). Thus,

1 direct ATP exposure triggers tubular contractions independent of cycle stage and luminal sperm  
 2 count. Third, we investigated if luminal movement is restricted to the area of stimulation or, by  
 3 contrast, if motion propagates beyond the directly stimulated tubule section. When we analyzed  
 4 luminal motion in equidistant tubule sections adjacent to the directly stimulated area (Figure 5A),  
 5 we found a significant, though relatively small bidirectional wave of propagating movement in  
 6 stage groups with a low luminal sperm count (Figure 5C<sub>i</sub>). Strikingly, we observed strong  
 7 unidirectional movement upon ATP stimulation of tubule sections with high luminal sperm density  
 8 (Figure 5C<sub>ii</sub>). In this stage group, luminal content is predominantly propelled towards areas of  
 9 ascending spermatogenic cycle stages. These findings demonstrate directionality of sperm  
 10 transport upon purinergic TPC stimulation.

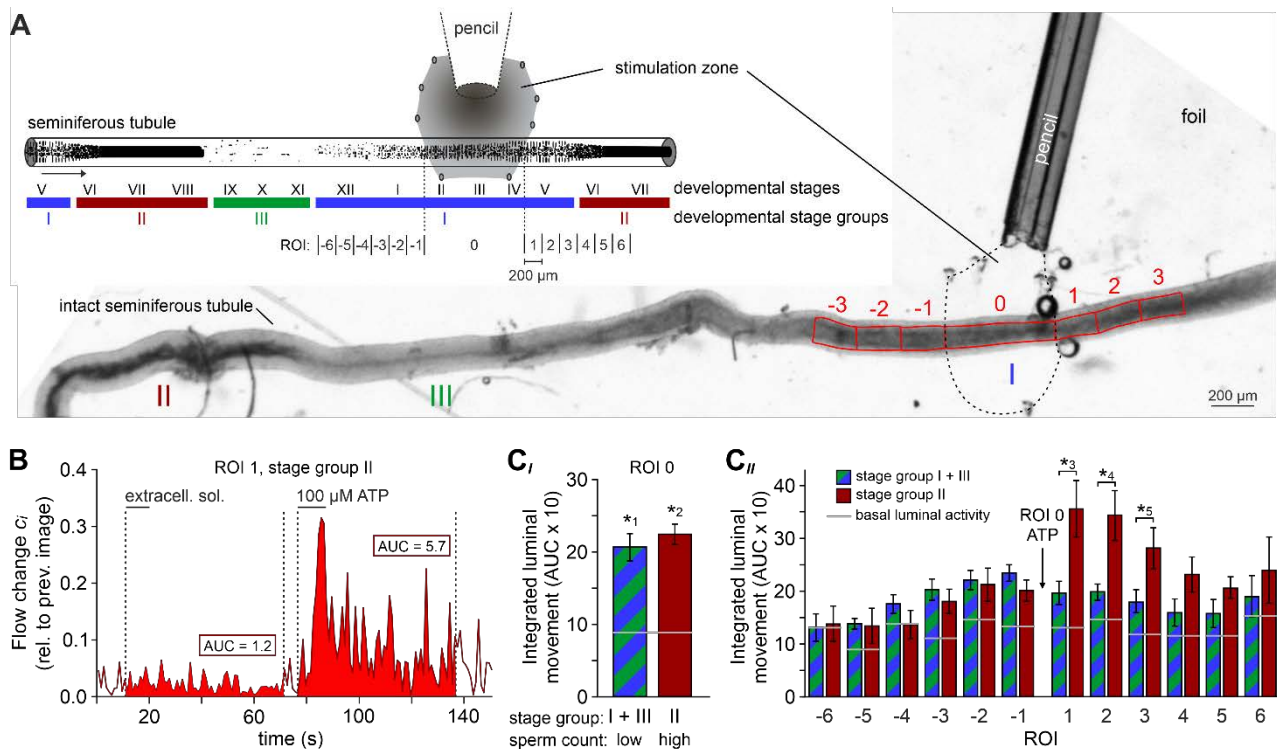

11 **Figure 5 | ATP drives directional luminal transport.** (A) Schematic drawing (top) and original low-  
 12 magnification image (bottom) of the experimental setup. Intact seminiferous tubules are placed on  
 13 transparent foil in a custom-built macroscopic imaging chamber. The tubule is kept stationary by gentle  
 14 suction through tiny holes punched in the foil and vacuum underneath. As previously suggested (Hess and  
 15 De Franca, 2008), tubules are coarsely categorized into three stages (I–III; color code) according to luminal  
 16 sperm content. Precise mapping of stimulated regions is feasible by positioning both tubule and perfusion  
 17 pencil within an area delimited by several holes that outline a stimulation zone (methods). The tubule region  
 18 directly exposed to ATP is designated as ROI 0, with adjacent equidistant sections numbered consecutively  
 19 (up to ROI  $\pm 6$ ). (B) Analysis of luminal content movement by calculation of flow change  $c_i$  relative to each

1 previous image (methods) within a representative luminal ROI. Motion is quantified by measuring the area  
2 under curve (AUC; solid red) within 60 s after stimulation onset. Note that mechanical control stimulation  
3 (extracellular solution) does not affect basal luminal motion. (C) Bar charts depicting luminal content  
4 movement (means  $\pm$  SEM) upon ATP stimulation (100  $\mu$ M; 10 s) in either directly exposed regions ( $c_i$ ;  $n =$   
5 17) or adjacent areas ( $c_{ii}$ ;  $n = 3-17$ ). Green / blue (groups I & III) and red (group II) bars depict stages with  
6 a low *versus* a high luminal sperm count, respectively. Horizontal grey lines mark the average basal luminal  
7 motion prior to stimulation. ATP induces significantly increased content movement in directly stimulated  
8 areas (ROI 0) independent of luminal sperm count / stage group ( $c_i$ ). Note that in adjacent regions ( $c_{ii}$ )  
9 unidirectional movement occurs exclusively in tubule sections with high luminal sperm density. Asterisks  
10 denote statistically significant differences ( $*1p = 8.7e^{-5}$ ;  $*2p = 6.7e^{-7}$ ;  $*3p = 0.005$ ;  $*4p = 0.002$ ;  $*5p = 0.03$ ;  
11 unpaired two-tailed  $t$ -test).  
12

13 As expected, ATP-induced tubule contractions also manifest as  $Ca^{2+}$  signals in TPCs (Figure  
14 6A&B, movie S5). Surprisingly, however, these  $Ca^{2+}$  elevations are limited to those areas directly  
15 exposed to ATP. We observed no such signals in adjacent tubule sections independent of the  
16 stimulated stage group and an ascending or descending stage direction (Figure 6C&D). This  
17 finding indicates that ATP acts as a local paracrine messenger that, by itself, is not sufficient to  
18 trigger a signal that propagates in a regenerative wave-like fashion along a tubule's longitudinal  
19 axis. In turn, transport directionality likely results from morphological characteristics rather than  
20 peristaltic contractility.

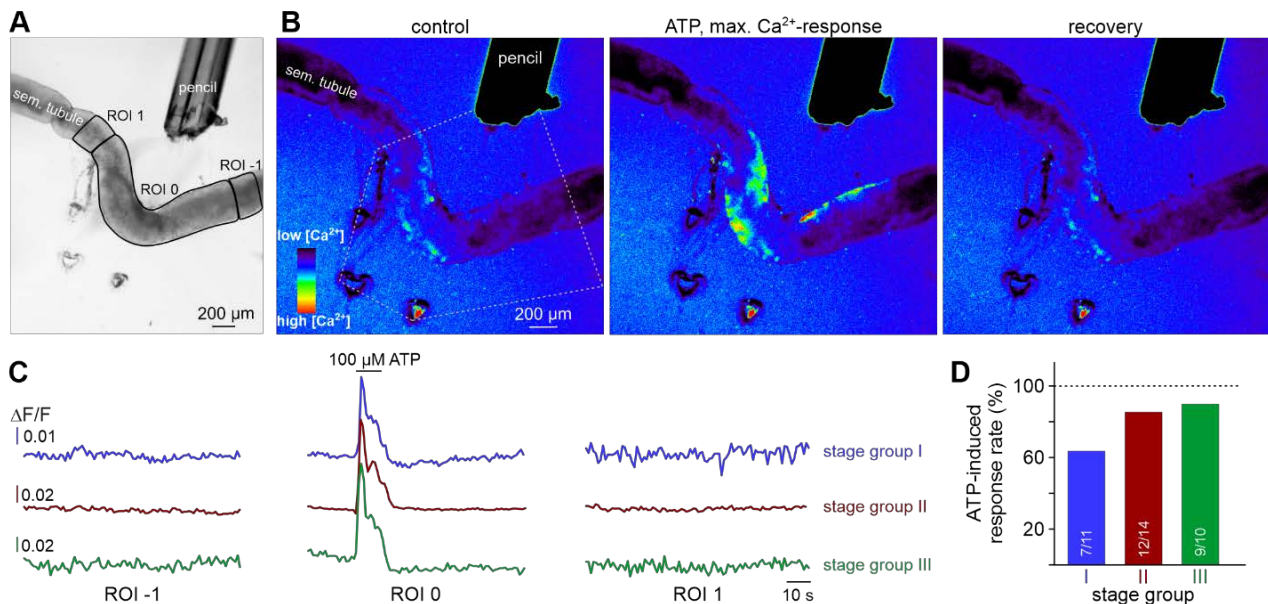

21  
22  
23 **Figure 6: ATP causes  $Ca^{2+}$  elevations within a restricted paracrine radius.** (A) Low-magnification  
24 brightfield image of an intact seminiferous tubule segment dissected from SMMHC-CreER<sup>T2</sup> x Ai95D mice  
25 and positioned directly in front of the tip of a 250  $\mu$ m diameter perfusion pencil. ROIs (black lines) are drawn

1 to encompass the area that is directly exposed to fluid flow (ROI 0) as well as adjacent regions (ROIs 1 and  
2 -1), respectively. Suction produced by negative pressure (applied through holes in the elastic foil pad  
3 beneath the tubule) limits the area of perfusion. (B) Pseudocolor GCaMP6f fluorescence intensity images  
4 of the tubule shown in (A) reveals  $\text{Ca}^{2+}$  transients in TPCs in response to ATP. Representative images  
5 (rainbow 256 colour map) correspond to time points before, during, and after focal ATP exposure (100  $\mu\text{M}$ ;  
6 10 s). The area directly challenged with ATP is denoted by the white dotted lines. For clarity,  
7 autofluorescence of the perfusion pencil was removed. Note that  $\text{Ca}^{2+}$  elevations are limited to ROI 0. (C)  
8 Representative original recordings of changes in GCaMP6f intensity ( $\Delta F/F$ ) over time from tubule segments  
9 of the three different stage groups (I–III). Traces exemplify  $\text{Ca}^{2+}$  signals (or the lack thereof) in ROIs 0, -1,  
10 and 1, respectively. Independent of the epithelial cycle stage investigated, ATP-induced  $\text{Ca}^{2+}$  elevations are  
11 restricted to directly exposed tissue segments. (D) Quantification of ATP sensitivity among tubule segments  
12 of different cycle stage. Bar charts illustrate that purinergic stimulation causes  $\text{Ca}^{2+}$  signals irrespective of  
13 stage and, thus, luminal sperm count. Numbers of experiments as indicated in bars.

### 15 **ATP induces tubular contractions *in vivo***

16 To ultimately attribute a physiological role to ATP-dependent  $\text{Ca}^{2+}$  signals in TPCs, tubular  
17 contractions, and corresponding transport of luminal content, these phenomena must (i) occur  
18 spontaneously in living animals, and must (ii) be triggered experimentally by ATP exposure *in vivo*.  
19 Thus, to investigate any *in vivo* relevance of our findings, we designed a custom-built 3D printed  
20 *in vivo* imaging stage (Figure 7–figure supplement 1) that allows both widefield epi-fluorescence  
21 and multiphoton microscopy of the mouse testis.

22 Initially, we monitored spontaneous seminiferous tubule activity in SMMHC-CreER<sup>T2</sup> x Ai95D  
23 mice. Multiphoton time-lapse imaging revealed spontaneous TPC  $\text{Ca}^{2+}$  signals that typically  
24 accompanied strong tubule contractions (Figure 7A&B, movie S6). Several characteristics  
25 emerged from quantitative analysis of these observations. First, during sufficiently long recording  
26 periods ( $\leq 10$  min), contractions occur in essentially all seminiferous tubules (Figure 7–figure  
27 supplement 2A). Second, contractions of individual tubules are not synchronized (Figure 7B).  
28 Third, periods of enhanced activity ( $\geq 2$  contractions within 90 s) are interrupted by long episodes  
29 of quiescence (Figure 7B, Figure 7–figure supplement 2B). Fourth, the durations of TPC  $\text{Ca}^{2+}$   
30 signals and corresponding contractions are positively correlated (Figure 7–figure supplement 2C),  
31 confirming a causal relationship.

1 Next, we asked whether spontaneous *in vivo* contractions are coordinated along the longitudinal  
 2 tubular axis. Low magnification incident light microscopy enabled simultaneous observation of  
 3 several superficial seminiferous tubule segments (Figure 7C). Movement analysis along the length  
 4 of digitally straightened tubules demonstrates wave-like unidirectional motions that propagate with  
 5 high velocities (Figure 7C&D). Notably, these coordinated contractile movements provide  
 6 sufficient force to ensure luminal sperm transport (movie S7).

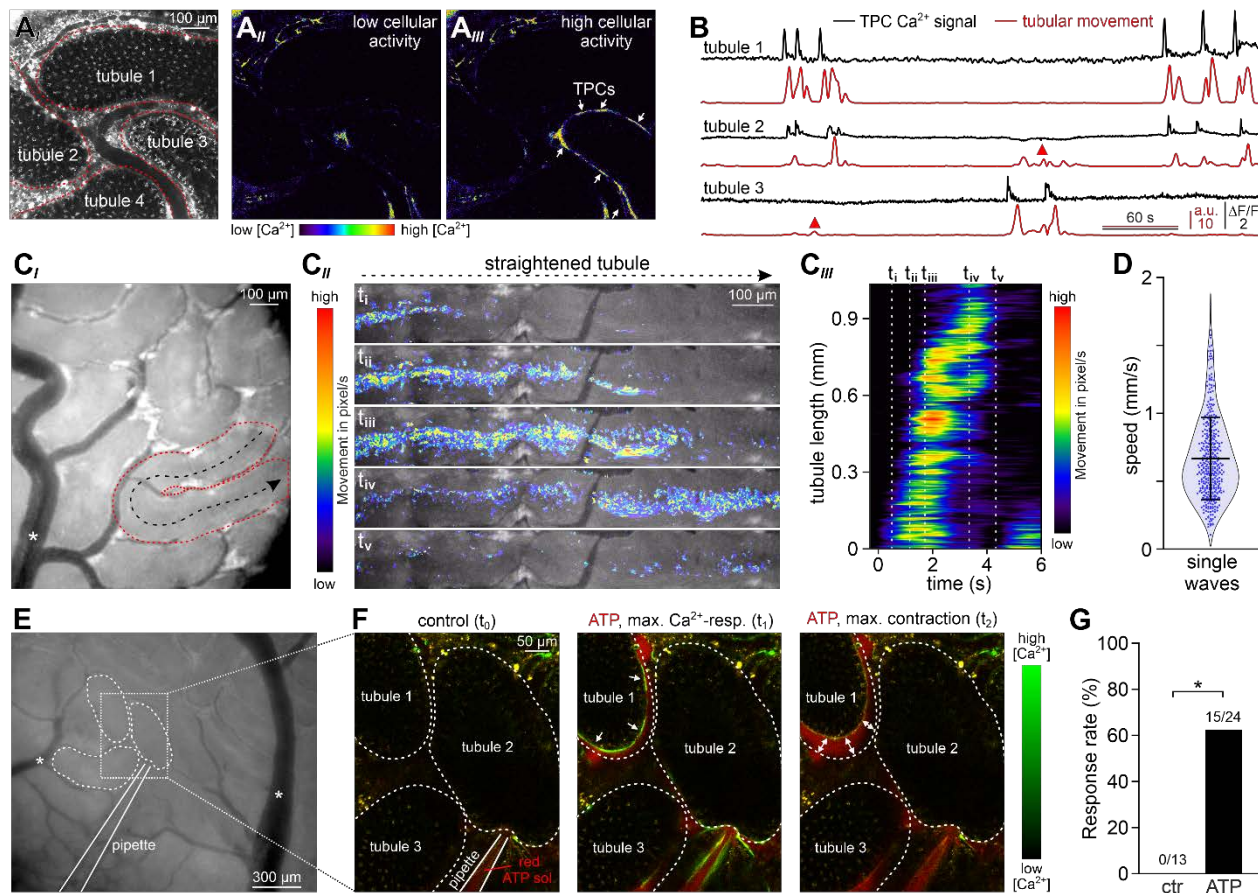

7 **Figure 7 | ATP induces tubular contractions *in vivo*.** (A) Multiphoton *in vivo* fluorescence microscopy in  
 8 SMMHC-CreER<sup>T2</sup> x Ai95D mice enables time-lapse imaging of TPC activity. Maximum grey scale projection  
 9 outlines segments from four seminiferous tubules (red dotted lines (A)). Pseudocolor images of GCaMP6f  
 10 intensity indicate  $[Ca^{2+}]_c$  changes in TPCs of tubule 3 during phases of low (AII) versus high (AIII)  
 11 spontaneous activity (rainbow colour map; white arrows in (AIII)). (B) Original traces depict simultaneous  
 12 TPC  $Ca^{2+}$  signals (black;  $\Delta F/F$ ) and tubular contractions (red; calculated as flow change  $c_i$  relative to each  
 13 previous image (methods) over time in tubules 1–3 (A). Red triangles mark passive movements, which  
 14 occur upon contractions of adjacent tubules. (C) Analysis of spontaneous tubular motion *in vivo*. Low  
 15 magnification incident light image of the mouse testis (CI) shows several superficial seminiferous tubule  
 16 segments, testicular blood vessels (white asterisk; note that unobstructed blood supply (i.e., visualizing  
 17 erythrocyte flow) is checked routinely), and a specific segment outlined by red dotted lines. After time-lapse

1 imaging, this segment is digitally straightened (**C<sub>ii</sub>**) and subjected to motion analysis. For different time points  
2 (**i–v**), pixel movement and its propagation are reflected by merged pseudocolor images. Directionality is  
3 indicated by the black arrow in (**C<sub>i</sub>**). From a kymograph (**C<sub>iii</sub>**), the time–space relationship of tubular motion  
4 becomes apparent (time points **i–v** as indicated by dashed vertical lines). (**D**) Violin plot depicting the  
5 velocity of contractile movement in individual tubule segments (blue dots). (**E–G**) ATP-induced Ca<sup>2+</sup> signals  
6 and contractions *in vivo*. (**E**) Low magnification epi-fluorescence image of several superficial seminiferous  
7 tubule segments and blood vessels (white asterisks). The boxed area includes three tubule segments  
8 (dotted black lines), which are targeted by a low resistance pipette filled with fluorescently labelled ATP  
9 solution. (**F**) Enlarged view of the area outlined in (**E**). Merged (red / green) multiphoton fluorescence images  
10 taken before and during / after brief stimulation with ATP. The middle and right frames correspond to the  
11 point of maximum Ca<sup>2+</sup> signal (green) and contraction (double arrows) of tubule 1, respectively. (**G**) Bar  
12 chart quantification of contractions induced by nanoliter puffs of saline with or without ATP (1 mM). Asterisk  
13 denotes statistical significance ( $p = 0.036$ ; Fisher's Exact test).

14  
15 Finally, we examined if brief focal ATP stimulation also triggers peritubular Ca<sup>2+</sup> signals and  
16 seminiferous tubule contractions *in vivo*. Therefore, we filled low resistance patch pipettes with  
17 fluorescently labelled ATP solution, penetrated the *tunica albuginea*, and targeted the interstitial  
18 space close to neighboring tubules (Figure 7E, movie S8). Nanoliter puffs of ATP-containing test  
19 solution induced both Ca<sup>2+</sup> transients in genetically labeled TPCs and strong tubule contractions  
20 in the majority of experiments (Figure 7F&G). By contrast, puffs of extracellular saline rarely  
21 stimulated any such response (Figure 7–figure supplement 2D). Taken together, *in vivo* recordings  
22 demonstrate that robust recurrent seminiferous tubule contractions (*i*) occur spontaneously, (*ii*)  
23 are driven by cytosolic Ca<sup>2+</sup> elevations in TPCs, and (*iii*) can be triggered experimentally by ATP  
24 exposure. Consequently, paracrine purinergic signaling in the mouse testis is a mediator of luminal  
25 sperm transport within the seminiferous tubule network.

## 26 27 28 Discussion

29 The molecular and cellular mechanisms that control paracrine testicular communication have to a  
30 large extent remained controversial, if not elusive (Schlatt and Ehmcke, 2014). For TPCs in  
31 particular, a contractile function under paracrine control and, consequently, a critical role in male  
32 infertility have long been proposed (Albrecht et al., 2006; Romano et al., 2005), but direct  
33 experimental evidence has been lacking (Mayerhofer, 2013). While several signaling molecules,

1 including vasopressin (Pickering et al., 1989), oxytocin (Worley et al., 1985), prostaglandins  
2 (Hargrove et al., 1975), endothelin (Filippini et al., 1993), and others (Albrecht et al., 2006;  
3 Mayerhofer, 2013), have been proposed to act on TPCs, a role of ATP in seminiferous tubule  
4 contractility has been explicitly ruled out early on (Hovatta, 1972). By contrast, our data reveal  
5 ATP is a strong stimulus that activates TPCs via P2X and P2Y receptors, mediating coordinated  
6 tubule contractions and luminal sperm transport *in situ* and *in vivo*. Both spontaneous and ATP-  
7 dependent contractions trigger fast, stage-dependent, and directional transport of luminal content.  
8 It is thus tempting to speculate that seminiferous tubule contractility in general, and purinergic TPC  
9 signaling in particular, are promising targets for male infertility treatment and / or contraceptive  
10 development.

## 13 **Materials and Methods**

### 14 **Animals**

15 All animal procedures were approved by local authorities and in compliance with both European  
16 Union legislation (Directive 2010/63/EU) and recommendations by the Federation of European  
17 Laboratory Animal Science Associations (FELASA). When possible, mice were housed in  
18 littermate groups of both sexes (room temperature (RT); 12:12 h light-dark cycle; food and water  
19 available *ad libitum*). If not stated otherwise, experiments used adult (>12 weeks) males. Mice  
20 were killed by CO<sub>2</sub> asphyxiation and decapitation using sharp surgical scissors. We used  
21 C57BL/6J mice (Charles River Laboratories, Sulzfeld, Germany) as well as offspring from crossing  
22 either SMMHC-CreER<sup>T2</sup> (JAX #019079) (Wirth et al., 2008) or 129S.FVB-Tg(Amh-cre)8815Reb/J  
23 (JAX #007915) (Holdcraft and Braun, 2004) mice with either Ai95D (JAX #028865) (Madisen et  
24 al., 2015) or Ai14D (JAX #007914) (Madisen et al., 2010) mice, respectively.

### 26 **Chemicals and solutions**

27 The following solutions were used:



1 (**S<sub>1</sub>**) 4-(2-Hydroxyethyl)piperazine-1-ethanesulfonic acid (HEPES) buffered extracellular solution  
2 containing (in mM) 145 NaCl, 5 KCl, 1 CaCl<sub>2</sub>, 0.5 MgCl<sub>2</sub>, 10 HEPES; pH = 7.3 (adjusted with  
3 NaOH); osmolarity = 300 mOsm (adjusted with glucose).

4 (**S<sub>2</sub>**) Oxygenated (95% O<sub>2</sub>, 5% CO<sub>2</sub>) extracellular solution containing (in mM) 120 NaCl, 25  
5 NaHCO<sub>3</sub>, 5 KCl, 1 CaCl<sub>2</sub>, 0.5 MgCl<sub>2</sub>, 5 N,N-bis(2-hydroxyethyl)-2-aminoethanesulfonic acid (BES);  
6 pH = 7.3; 300 mOsm (glucose).

7 (**S<sub>3</sub>**) Extracellular low Ca<sup>2+</sup> solution containing (in mM) 145 NaCl, 5 KCl, 0.5 MgCl<sub>2</sub>, 10 HEPES; pH  
8 = 7.3 (NaOH); osmolarity = 300 mOsm (glucose); [Ca<sup>2+</sup>]<sub>free</sub> = ~110 nM (1 mM EGTA, 0.5 mM  
9 CaCl<sub>2</sub>) or 12 nM (1 mM EGTA, 0.1 mM CaCl<sub>2</sub>).

10 (**S<sub>4</sub>**) Oxygenated (95% O<sub>2</sub>, 5% CO<sub>2</sub>) extracellular solution containing (in mM) 120 NaCl, 25  
11 NaHCO<sub>3</sub>, 5 KCl, 0.5 MgCl<sub>2</sub>, 5 BES; pH = 7.3; 300 mOsm (glucose); [Ca<sup>2+</sup>]<sub>free</sub> = 110 nM (1 mM  
12 EGTA, 0.5 mM CaCl<sub>2</sub>) or 12 nM (1 mM EGTA, 0.1 mM CaCl<sub>2</sub>).

13 (**S<sub>5</sub>**) Gluconate-based extracellular solution containing (in mM) 122.4 Na gluconate, 22.6 NaCl, 5  
14 KCl, 1 CaCl<sub>2</sub>, 0.5 MgCl<sub>2</sub>, 10 HEPES; pH = 7.3 (adjusted with NaOH); osmolarity = 300 mOsm  
15 (glucose).

16 (**S<sub>6</sub>**) Standard pipette solution containing (in mM) 143 KCl, 2 KOH, 1 EGTA, 0.3 CaCl<sub>2</sub>, 10 HEPES  
17 ([Ca<sup>2+</sup>]<sub>free</sub> = 110 nM); pH = 7.1 (adjusted with KOH); osmolarity = 290 mOsm (glucose).

18 (**S<sub>7</sub>**) Gluconate-based pipette solution containing (in mM) 110 Cs gluconate, 30 CsCl, 2 CsOH, 1  
19 EGTA, 0.3 CaCl<sub>2</sub>, 10 HEPES ([Ca<sup>2+</sup>]<sub>free</sub> = 110 nM); pH = 7.1 (adjusted with CsOH); osmolarity =  
20 290 mOsm (glucose).

21 In some experiments Na-GTP (0.5 mM) was added to the pipette solution. Free Ca<sup>2+</sup>  
22 concentrations were calculated using WEBMAXCLITE v1.15. If not stated otherwise, chemicals  
23 were purchased from Sigma (Schnelldorf, Germany). Cyclopiazonic-acid (CPA) and 2'(3')-O-(4-  
24 Benzoylbenzoyl)adenosine-5'-triphosphate (BzATP) triethylammonium salt was purchased from  
25 Tocris Bioscience (Bristol, UK). Fura-2/AM was purchased from Thermo Fisher Scientific  
26 (Waltham, MA). Final solvent concentrations were ≤0.1%. When high ATP concentrations (≥1 mM)  
27 were used, pH was readjusted.

28

## 1 **Stimulation**

2 For focal stimulation, solutions and agents were applied from air pressure-driven reservoirs via an  
3 8-in-1 multi-barrel 'perfusion pencil' (AutoMate Scientific; Berkeley, CA). Changes in focal  
4 superfusion (Veitinger et al., 2011a) were software-controlled and, if required, synchronized with  
5 data acquisition by TTL input to 12V DC solenoid valves using a TIB 14S digital output trigger  
6 interface (HEKA Elektronik, Lambrecht/Pfalz, Germany). For focal stimulation during *in vivo*  
7 recordings, ATP was puffed from pulled glass pipettes using a microinjection dispense system  
8 (Picospritzer III; Parker Hannifin, Hollis, NH).

9 Extracellular low  $\text{Ca}^{2+}$  solutions (**S<sub>3</sub>** & **S<sub>4</sub>**) were applied via both the bath and perfusion pencil. To  
10 ensure depletion of  $\text{Ca}^{2+}$  stores by CPA we monitored intracellular  $\text{Ca}^{2+}$  levels during drug  
11 treatment (0.05 Hz frame rate). Transient CPA-dependent  $\text{Ca}^{2+}$  elevations lasted 10 – 40 min.  
12 After baseline  $\text{Ca}^{2+}$  levels were restored, cells / slices were again challenged with ATP. Control  
13 recordings, omitting CPA, were performed under the same conditions.

## 14 **Slice preparation**

15 Acute seminiferous tubule slices were prepared as previously described (Fleck et al., 2016) with  
16 minor modifications. Briefly, seminiferous tubules from young adults were isolated after *tunica*  
17 *albuginea* removal, embedded in 4% low-gelling temperature agarose (VWR, Erlangen,  
18 Germany), and 250  $\mu\text{m}$  slices were cut with a VT1000S vibratome (Leica Biosystems, Nussloch,  
19 Germany). Acute slices were stored in a submerged, oxygenated storage container (**S<sub>2</sub>**; RT).  
20 When using testicular tissue from Ai95D mice, slices were protected from light during storage to  
21 avoid GCamp6f bleaching.  
22

## 23 **TPC culture**

24 After mouse testis isolation and removal of the *tunica albuginea*, the seminiferous tubules were  
25 placed in Dulbecco's Modified Eagle Medium / Nutrient Mixture F-12 (DMEM/F-12; Invitrogen)  
26 containing 1 mg ml<sup>-1</sup> collagenase A and 6  $\mu\text{g}$  ml<sup>-1</sup> DNase (10 min; 34°C; shaking water bath (60  
27 cycles min<sup>-1</sup>)). Three times, the samples were washed (DMEM/F-12; 5 ml), allowed to settle for  
28

1 5 min, and the supernatant was discarded. Next, tubules were incubated DMEM/F-12 containing  
2 1 mg ml<sup>-1</sup> trypsin and 20 µg ml<sup>-1</sup> DNase (20 min; 34°C; shaking water bath (60 cycles min<sup>-1</sup>)).  
3 Digestion was stopped by addition of 100 µg ml<sup>-1</sup> soybean trypsin inhibitor (SBTI) and 20 µg ml<sup>-1</sup>  
4 DNase in phosphate-buffered saline (D-PBS). Then, samples were allowed to settle for 5 min and  
5 the supernatant was collected. After two more cycles of washing (DMEM/F-12), settling (5 min),  
6 and supernatant collection, the collected cell suspension was centrifuged (10 min; 400g) and the  
7 supernatant discarded. The pellet was resuspended in DMEM containing FBS (10%) and penicillin  
8 G / streptomycin (1%), filtered (cell strainer (100 µm)), and cells were plated in 75 cm<sup>2</sup> cell culture  
9 flask (T75; Invitrogen) and placed in a humidified incubator (37°C; 5% CO<sub>2</sub>). Approximately 1/3 of  
10 medium volume was replaced every 3 days. Cells usually reached 100% confluence after 7 days  
11 *in vitro* (DIV). Then, cells were washed twice (DPBS<sup>-</sup>; 5 min; 37°C) and incubated in 0.05% trypsin  
12 / EDTA (5 min; 37°C). Detachment of cells was checked visually and, if necessary, facilitated  
13 mechanically. The cell suspension was centrifuged (3 min; 800g) and the supernatant discarded.  
14 The pellet was resuspended in DMEM at cell densities of ~10<sup>5</sup> cells ml<sup>-1</sup> and plated again either  
15 in culture flasks or on glass coverslips in 35 mm dishes for experimental use. Again, 1/3 of medium  
16 volume was replaced every 3 days. Experiments were performed for ≤5 days after passage.

17 Human TPCs were isolated from small testicular tissue fragments derived from consenting donors  
18 with obstructive azoospermia and normal spermatogenesis as described (Albrecht et al., 2006;  
19 Walenta et al., 2018). The study was approved by the local ethical committee (Ethikkommission,  
20 School of Medicine, TU Munich, project 169/18S).

## 21 22 **Gene expression analysis**

23 Total RNA was isolated and purified from cultured mouse TPCs (passage 1) with Trizol followed  
24 by complementary DNA synthesis with RevertAid™ H Minus kit (#K1632 Thermo Fisher)  
25 according to the manufacturer's instructions. Controls in which the reverse transcriptase was  
26 omitted were routinely performed. PCR amplification was performed during 30 thermal cycles  
27 (95°C, 20 s; 58°C, 20 s; 72°C, 20 s). The following specific primer pairs were used for PCR  
28 amplification:

| <b>target</b> | <b>forward primer 5'-3'</b> | <b>reverse primer 5'-3'</b> |
|---------------|-----------------------------|-----------------------------|
| P2X1          | CCGAAGCCTTGCTGAGAA          | GGTTTGCAGTGCCGTACAT         |
| P2X2          | GACCTCCATCGGGGTGGGCT        | TGGGGTCCGTGGATGTGGAGT       |
| P2X3          | CTGCCTAACCTCACCGACAAG       | AATACCCAGAACGCCACCC         |
| P2X4          | CCCTTTGCCTGCCCAGATAT        | CCGTACGCCTTGGTGAGTGT        |
| P2X5          | GCTGCCTCCCCTGCAACCC         | AAGCCCCAGCACCCATGAGC        |
| P2X6          | CCCAGAGCATCCTTCTGTTCC       | GGCACCAGCTCCAGATCTCA        |
| P2X7          | GTCTCGCCTACCGGAGCAACG       | ATGTCCTGGGAGCCGAAGCG        |
| P2Y1          | CGACAGGGTTTATGCCACTT        | TCGTGTCTCCATTCTGCTTG        |
| P2Y2          | CGTGCTCTACTTCGTCACCA        | GACCTCCTGTGGTCCCATAA        |
| P2Y4          | ACTGGCTTCTGCAAGTTCGT        | AGGCAGCCAGCTACTACCAA        |
| P2Y6          | CATTAGCTTCCAGCGCTACC        | GCTCAGGTCGTAGCACACAG        |
| P2Y12         | CATTGCTGTACACCGTCCTG        | AACTTGGCACACCAAGGTTC        |
| GAPDH         | CAAGGTCATCCATGACAACCTTG     | GTCCACCACCCTGTTGCTGTAG      |

1

## 2 **Immunochemistry and tissue clearing**

3 For immunochemistry of testicular cryosections, testes were fixed with 4% (w/v) paraformaldehyde  
4 (PFA) in PBS<sup>-/-</sup> (10 mM, pH 7.4; ≥12 h; 4°C) and subsequently cryoprotected in PBS<sup>-/-</sup> containing  
5 30% sucrose (≥24 h; 4°C). Samples were then embedded in Tissue Freezing Medium (Leica  
6 Biosystems), sectioned at 20 μm on a Leica CM1950 cryostat (Leica Biosystems), and mounted  
7 on Superfrost Plus slides (Menzel, Braunschweig, Germany). For immunostaining of cultured  
8 mouse TPCs, cells were washed (3x; PBS<sup>-/-</sup>), fixed with ice-cold 4% PFA in PBS<sup>-/-</sup> (20 min; RT),  
9 and washed again (3x; PBS<sup>-/-</sup>). For blocking, sections / cells were incubated in PBS<sup>-/-</sup> containing  
10 Tween-20 (0.1%) / BSA (3%) solution (1 h; RT). After washing (PBS<sup>-/-</sup>; 2 x 5 min), sections / cells  
11 were incubated FITC-conjugated monoclonal anti-actin, α-smooth muscle (α-SMA-FITC, cat #  
12 F3777, MilliporeSigma) antibody (1:500 in 3% BSA; 1 h; RT). Excess antibodies were removed  
13 by washing (2 x 5 min PBS<sup>-/-</sup>). For nuclear counterstaining, sections / cells were then incubated in

1 PBS<sup>-/-</sup> containing either DAPI (5 µg ml<sup>-1</sup>; 10 min; RT; Thermo Fisher Scientific) or DRAQ5 (1:500;  
2 5 min; RT; Thermo Fisher Scientific).

3 Fluorescent images were taken using either an inverted microscope (Leica DMI4000B, Leica  
4 Microsystems) or an upright fixed stage scanning confocal microscope (TCS SP5 DM6000 CFS;  
5 Leica Microsystems) equipped with a 20x 1.0 NA water immersion objective (HCX APO L; Leica  
6 Microsystems). To control for non-specific staining, experiments in which the primary antibody  
7 was omitted were performed in parallel with each procedure. Digital images were uniformly  
8 adjusted for brightness and contrast using Adobe Photoshop CS6 (Adobe Systems, San Jose,  
9 CA, USA).

10 For testicular tissue clearing we adopted the CLARITY method (Chung et al., 2013) with minor  
11 modifications (Gretenkord et al., 2019). Briefly, testes from adult mice were fixed overnight at 4°C  
12 in hydrogel fixation solution containing 4% acrylamide, 0.05% bis-acrylamide, 0.25% VA-044  
13 Initiator, 4% PFA in PBS<sup>-/-</sup> to maintain structural integrity. After hydrogel polymerization, lipids were  
14 removed by incubation in 4% sodium dodecyl phosphate (SDS) solution with 200 mM boric acid  
15 (pH 8.5) over periods of two months. Solutions were changed bi-weekly. During the final incubation  
16 period, the nuclear marker DRAQ5 (1:1000) was added. After washing (2 d) with PBST (0.1%  
17 TritonX), samples were incubated for 24 h in RIMS80 containing 80 g Nycodenz, 20 mM PS, 0.1%  
18 Tween 20, and 0.01% sodium acid. Cleared samples were imaged using a Leica TCS SP8 DLS  
19 confocal microscope, equipped with a digital light-sheet module, 552 nm and 633 nm diode lasers,  
20 a HC PL FLUOTAR 5x/0.15 IMM DLS objective (observation), a L 1.6x/0.05 DLS objective  
21 (illumination), a DLS TwinFlect 7.8 mm Gly mirror cap, and a DFC9000 sCMOS camera.  
22 Rendering and three-dimensional reconstruction of fluorescence images was performed using  
23 Imaris 8 microscopy image analysis software (Bitplane, Zurich, Switzerland).

## 24 25 **Electrophysiology**

26 Whole-cell patch-clamp recordings were performed as described (Fleck et al., 2016; Veitinger et  
27 al., 2011b). Briefly, mouse TPCs were transferred to the stage of an inverse microscope (DMI  
28 4000B, Leica Microsystems), equipped with phase contrast objectives and a cooled CCD-camera  
29 (DFC365FX, Leica Microsystems). Cells were continuously superfused with solution **S**<sub>1</sub> (~3 ml

1 min<sup>-1</sup>; gravity flow; ~23°C). Patch pipettes (~5 MΩ) were pulled from borosilicate glass capillaries  
2 with filament (1.50 mm OD / 0.86 mm ID; Science Products) on a PC-10 vertical two-step  
3 micropipette puller (Narishige Instruments, Tokyo, Japan), fire-polished (MF-830 Microforge;  
4 Narishige Instruments) and filled with **S**<sub>6</sub>. An agar bridge (150 mM KCl) connected reference  
5 electrode and bath solution. An EPC-10 amplifier controlled by Patchmaster 2.9 software (HEKA  
6 Elektronik) was used for data acquisition. We monitored and compensated pipette and membrane  
7 capacitance ( $C_{\text{mem}}$ ) as well as series resistance ( $R_{\text{series}}$ ).  $C_{\text{mem}}$  values served as a proxy for the cell  
8 surface area and, thus, for normalization of current amplitudes (i.e., current density). Cells  
9 displaying unstable  $R_{\text{series}}$  values were not considered for further analysis. Liquid junction  
10 potentials were calculated using JPCalcW software (Barry, 1994) and corrected online. Signals  
11 were low-pass filtered [analog 3- and 4-pole Bessel filters (-3 dB); adjusted to  $1/3 - 1/5$  of the  
12 sampling rate (10 kHz)]. Holding potential ( $V_{\text{hold}}$ ) was -60 mV.

## 14 **Fluorescence Ca<sup>2+</sup> imaging**

15 Cultured mouse TPCs were imaged as described (Veitinger et al., 2011b). Briefly, cells were  
16 loaded with fura-2/AM in the dark (5 μM; 30 min; RT; **S**<sub>1</sub>) and imaged with an upright microscope  
17 (Leica DMI6000FS, Leica Microsystems) equipped for ratiometric live-cell imaging with a 150W  
18 xenon arc lamp, a motorized fast-change filter wheel illumination system for multi-wavelength  
19 excitation, a CCD camera (DFC365 FX, Leica), and Leica LAS X imaging software. Ten to thirty  
20 cells in randomly selected fields of view were viewed at 20x magnification and illuminated  
21 sequentially at 340 nm and 380 nm (cycle time 2 s). The average pixel intensity at 510 nm  
22 emission within user-selected ROIs was digitized and calculated as the  $f_{340}/f_{380}$  intensity ratio.

23 For parallel recordings of intracellular Ca<sup>2+</sup> signals and tubular contractions, acute seminiferous  
24 tubule slices were bulk-loaded with fura-2/AM in the dark (30 μM; 30 min; RT). After washing (3x;  
25 **S**<sub>1</sub>), slices were transferred to a recording chamber and imaged with an upright microscope (Leica  
26 DMI6000FS, see above). We installed a custom-built reflective shield beneath the recording  
27 chamber for parallel monitoring of fluorescence and reflected light. At 1 Hz imaging cycles, we  
28 thus recorded two 510 nm fluorescence images (340 / 380 nm excitation) and a 'pseudo-

1 brightfield' reflected light image that allowed quasi simultaneous analysis of intracellular Ca<sup>2+</sup> and  
2 tubular movement.

### 4 **Whole-mount seminiferous tubule imaging**

5 Isolated tubules (>1 cm length) were placed onto a membrane within a custom-built 3D printed  
6 two-compartment recording chamber that was constantly superfused with **S**<sub>1</sub>. Small membrane  
7 holes under the tubules and around a defined stimulation area allowed for (*i*) gentle fixation of the  
8 tubules and (*ii*) focal ATP perfusion of selected tubular regions by vacuum-generated negative  
9 pressure (80-180 mmHg) in the submembraneous chamber compartment and continuous suction  
10 of **S**<sub>1</sub> from the top compartment. After visual determination of tubular stage (*I – III*) (Parvinen,  
11 1982), the perfusion pencil was positioned to selectively stimulate an area of known and  
12 homogeneous stage. Focal stimulation in the desired area was routinely confirmed by transient  
13 dye perfusion (Fast Green) prior to ATP exposure. ATP stimulations (100 μM; 10 s) and  
14 corresponding negative controls were compared to determine ATP-dependent Ca<sup>2+</sup> signals  
15 (offspring from crossing SMMHC-CreER<sup>T2</sup> and Ai95D mice) or tubular contractions and sperm  
16 transport. For low-magnification brightfield or fluorescence imaging, we used a MacroFluo Z16  
17 APO A system (Leica Microsystems) equipped with either a DFC450C camera and a PLANAPO  
18 1.0x / WD 97 mm objective (brightfield) or with a monochrome DFC365FX camera and a 5.0x  
19 /0.50 LWD PLANAPO objective (fluorescence). Images were acquired at 1 Hz.

### 21 ***In vivo* imaging**

22 We administered tamoxifen (75 mg tamoxifen kg<sup>-1</sup> body weight) to double-positive adult male  
23 *offspring* (SMMHC-CreER<sup>T2</sup> x Ai95D) via daily intraperitoneal injections for 5 consecutive days.  
24 Mice were closely monitored for any adverse reactions to the treatment. Experiments were  
25 performed 2–5 weeks after the first injection. For surgery, mice were anesthetized with ketamine-  
26 xylazine-buprenorphine (100 mg kg<sup>-1</sup>, 10 mg kg<sup>-1</sup>, 0.05–0.1 mg kg<sup>-1</sup>, respectively; Reckitt  
27 Benckiser Healthcare, UK). First, we made an incision next to the *linea alba* in the hypogastric  
28 region, followed by a 5 mm incision into the peritoneum. One testis was gently lifted from the  
29 abdominal cavity. Its *gubernaculum* was cut and the testis – with the spermatic cord, its blood

1 vessels and *vas deferens* still intact – was transferred to a temperature-controlled imaging  
2 chamber filled with extracellular solution (**S**<sub>1</sub>; 35°C), mounted on custom-designed 3D printed *in*  
3 *vivo* stage (Figure 7–figure supplement 1). Throughout each experiment, vital signs (heartbeat,  
4 blood oxygen level, breathing rhythm) were constantly monitored and recorded (breathing).  
5 Moreover, we routinely checked unobstructed blood flow within testicular vessels during  
6 experiments. To avoid movement artifacts, the tunica was glued to two holding strings using  
7 Histoacryl tissue adhesive. After surgery, anesthesia was maintained by constant isoflurane  
8 inhalation (1–1.5% in air). Time-lapse intravital imaging was performed using a Leica TCS SP8  
9 MP microscope. For incident light illumination / reflected light widefield recordings (5–10 Hz), we  
10 used N PLAN 5x/0.12 or HC APO L10x/0.30 W DLS objectives with large fields of view.  
11 Multiphoton time-lapse images were acquired at ~2 Hz frame rates using external hybrid detectors  
12 and the HCX IRAPO L25x/0.95 W objective at 930 nm excitation wavelength. For *in vivo*  
13 stimulation experiments, we used a Picospritzer III (Parker Hannifin, Pine Brook, NJ) to puff  
14 nanoliter volumes of control saline (**S**<sub>1</sub>; containing Alexa Fluor 555 (4 μM)) or stimulus solution  
15 (**S**<sub>1</sub>; containing Alexa Fluor 555 (4 μM) and ATP (1 mM)), respectively, from beveled glass  
16 micropipettes onto the surface of seminiferous tubules.

## 18 **Data analysis**

19 All data were obtained from independent experiments performed on at least three days. Individual  
20 numbers of cells / tubules / experiments (n) are denoted in the respective figures and / or legends.  
21 If not stated otherwise, results are presented as means ± SEM. Statistical analyses were  
22 performed using paired or unpaired *t*-tests, one-way ANOVA with Tukey's HSD *post hoc* test or  
23 the Fisher Exact test (as dictated by data distribution and experimental design). Tests and  
24 corresponding *p*-values that report statistical significance (≤0.05) are individually specified in the  
25 legends. Data were analyzed offline using FitMaster 2.9 (HEKA Elektronik), IGOR Pro 8  
26 (WaveMetrics), Excel 2016 (Microsoft, Seattle, WA), and Leica LAS X (Leica Microsystems)  
27 software. Dose-response curves were fitted by the Hill-equation. Time-lapse live-cell imaging data  
28 displaying both Ca<sup>2+</sup> signals and tubular contractions were analyzed using custom-written code in  
29 MATLAB (The MathWorks, Natick, MA).



1 For quantitative image analysis, images from both reflected light and fluorescence time-lapse  
2 recordings were registered to their respective first image frame at time point  $t_0$ , using the  
3 registration algorithm from (Liu et al., 2015) (implementation in (Evangelidis, 2013)), resulting in  
4 stabilized recordings without movement. For fura-2 fluorescence recordings, we first performed a  
5 single registration on the combined image ( $f_{340} + f_{380}$ ) and then applied the displacement vector  
6 field, computed by the registration algorithm, to both images ( $f_{340}$  and  $f_{380}$ ) separately. ROIs were  
7 defined manually at  $t_0$  and superimposed onto all subsequent images of the stabilized recording.  
8 At each time point  $t_i$ , the fluorescence signal  $F$  was computed as the mean  $f_{340}/f_{380}$  ratio of all  
9 pixels within a given ROI. When measuring  $\text{Ca}^{2+}$ -dependent changes in GCaMP6f intensity, the  
10 fluorescence signal  $F$  was normalized with respect to a baseline before stimulation, computing the  
11 intensity change for the  $i^{\text{th}}$  time point as  $\frac{F_i - F_{\text{baseline}}}{F_i}$ . For clarity, linear baseline shifts were corrected  
12 in some example traces.

13 Seminiferous tubule contractions and transport of luminal content were visualized by reflected light  
14 microscopy of acute slices or whole-mount macroscopic tubule imaging, respectively. Data from  
15 both types of time-lapse recordings were analyzed and quantified as either flow strength or flow  
16 change (see below). For each frame at a given time point  $t_i$ , the registration algorithm computed  
17 a flow or displacement vector field  $V_i = \begin{pmatrix} \mathbf{v}_{1,1} & \cdots & \mathbf{v}_{1,n} \\ \vdots & \ddots & \vdots \\ \mathbf{v}_{m,1} & \cdots & \mathbf{v}_{m,n} \end{pmatrix}$ , where  $\mathbf{v}_{1,1} = (x, y)$  is a vector indicating  
18 strength and direction of the displacement of pixel (1,1) between time points  $t_0$  and  $t_i$ . The average  
19 norm  $|V_i| = \frac{1}{mn} \sum_{p,q} \|\mathbf{v}_{p,q}\|$  is a measure for the effort that is necessary to register the image at  $t_0$   
20 to the image at  $t_i$ . The flow field strength quantified by this measure is interpreted as the amount  
21 of visible changes that, dependent on the experiment, result from tubule contraction and / or  
22 luminal content movement. For analysis of contractions in acute seminiferous tubule slices  
23 (Figures 3, 4, 7), we quantified the *flow strength*  $s_i$  within an ROI as the average norm  $|V_i|$   
24 computed only for the  $\mathbf{v}_{p,q}$  corresponding to pixels within the ROI defined at  $t_0$ . For whole-mount

1 macroscopic imaging of luminal content movement in intact tubule segments (Figure 5), we  
2 quantified the *flow change*  $c_i = s_i - s_{i-1}$  as the change of flow strength between two consecutive  
3 time points / frames. Here,  $s_i$  values were preprocessed by smoothing with a moving average  
4 filter. Results are reported as the AUC, i.e., the area under the  $c_i$  curve.

5 For analysis of *in vivo* data, we employed a custom set of ImageJ macros utilizing build-in functions  
6 of Fiji-ImageJ (Rueden et al., 2017; Schindelin et al., 2012). Widefield imaging data was first  
7 corrected for brightness fluctuation caused by a 50 Hz AC power supply. Here, we used the *bleach*  
8 *correction* plugin in histogram matching mode (Miura et al., 2014). Next, we applied Gaussian filter  
9 functions (*GausBlur* (5 px radius) and *Gaussian Blur3D* (x=0, y=0, z=5)). We calculated flow  
10 change via the *Gaussian Window MSE* function (sigma = 1; max distance = 3). Tubule selection  
11 used the polyline tool (line width adjusted to tubule diameter). Selected tubules ranged from  
12 200  $\mu\text{m}$  to 3.4 mm length. Next, flow fields of individual tubules were straightened. Average  
13 movement intensity was calculated from transversal line profiles (perpendicular to the straightened  
14 longitudinal axis of each tubule) and plotted as kymographs (space-time plots) to measure  
15 movement progression speed from linear regressions.

16 Multiphoton time-lapse imaging data was recorded in dual-channel mode, with (*i*) a target channel  
17 recording GCaMP6f fluorescence and some background signal (525\50 nm), and (*ii*) a  
18 background channel mainly recording autofluorescence (585\40 nm), allowing for background  
19 correction of the GCaMP6f signal using a dye separation routine. Slow constant movement in both  
20 channels was registered and removed to correct for steady drift. After Gaussian filtering (*GausBlur*  
21 (5 px radius); *Gaussian Blur3D* (x=0, y=0, z=5)), flow fields were calculated from the background  
22 signal. Again, flow change was calculated via the *Gaussian Window MSE* function (sigma = 1;  
23 max distance = 3).

## 1 **Additional information**

### 2 **Competing interests**

3 The authors declare no competing financial interests.

### 5 **Funding**

6 This work was funded by the Deutsche Forschungsgemeinschaft (DFG, German Research  
7 Foundation) – 368482240/GRK2416 (NM & MSp); 412888997 (DF); 245169951 (AMa & MSp) –  
8 and by the Volkswagen Foundation (MSp, I/83533); MSp is a Lichtenberg Professor of the  
9 Volkswagen Foundation.

### 11 **Author contributions**

12 D.F. and L.K. contributed equally and have equal right to list themselves first in bibliographic  
13 documents. D.F., L.K., A.Ma., J.S., and M.Sp. contributed substantially to the conception of this  
14 work. D.F., L.K., N.M., N.U., J.S., and M.Sp. designed experiments. D.F., L.K., N.M., F.B., A.Mi.,  
15 R.M., N.U., M.St., and J.S. contributed to data acquisition and analysis. D.F., L.K., N.M., M.St.,  
16 F.B., A.Ma., J.S., and M.Sp. contributed to data interpretation. M.St. and D.M. created new  
17 software used for contraction analysis. All authors have drafted the work and / or substantively  
18 revised it. All authors have approved the submitted version of the manuscript.

### 20 **Author ORCIDs**

21 David Fleck  <https://orcid.org/0000-0002-6692-2388>

22 Nadine Mundt  <https://orcid.org/0000-0003-3370-2933>

23 Felicitas Bruentgens  <https://orcid.org/0000-0001-7754-1313>

24 Naofumi Uesaka  <https://orcid.org/0000-0002-9744-944X>

25 Artur Mayerhofer  <https://orcid.org/0000-0002-9388-4639>

26 Marc Spehr  <https://orcid.org/0000-0001-6616-4196>

1

## 2 **Ethics**

3 Mice were maintained and sacrificed according to European Union legislation (Directive  
4 2010/63/EU) and recommendations by the Federation of European Laboratory Animal Science  
5 Associations (FELASA). All experimental procedures were approved by the State Agency for  
6 Nature, Environment and Consumer Protection (LANUV; protocol number / AZ 84-  
7 02.04.2016.A371).

8

## 9 **Acknowledgements**

10 We thank Corinna Engelhardt, Jessica von Bongartz, and Stefanie Kurth (RWTH Aachen  
11 University) for assistance, Andreas Meinhardt and Jörg Klug (Justus-Liebig-University Giessen)  
12 for kindly providing detailed information about the mouse TPC cell culture protocol, Andrea  
13 Mietens and Ralf Middendorff (Justus-Liebig-University Giessen) for comments and suggestions,  
14 J. Ullrich Schwarzer (Andrology-Center, Munich) and Frank-Michael Köhn (Andrologicum,  
15 Munich) for providing human samples, and all members of the Spehr laboratory for discussions.

16

## 17 **Data and materials availability**

18 All data is available in the main text or the supplementary materials. Previously unpublished  
19 source code for data analysis (quantification of tubular contractions, flow strength/change, Ca<sup>2+</sup>  
20 signals) is available at: [https://github.com/rwth-lfb/Fleck\\_Kenzler\\_et\\_al](https://github.com/rwth-lfb/Fleck_Kenzler_et_al)

21

22

## 23 **References**

24 Ailenberg M, Tung PS, Fritz IB. 1990. Transforming Growth Factor- $\beta$  Elicits Shape Changes and  
25 Increases Contractility of Testicular Peritubular Cells. *Biol Reprod* **42**:499–509.  
26 doi:10.1095/biolreprod42.3.499

27 Albrecht M, Rämisch R, Köhn FM, Schwarzer JU, Mayerhofer A. 2006. Isolation and cultivation of

- 1 human testicular peritubular cells: A new model for the investigation of fibrotic processes in  
2 the human testis and male infertility. *J Clin Endocrinol Metab* **91**:1956–1960.  
3 doi:10.1210/jc.2005-2169
- 4 Barry PH. 1994. JPCalc, a software package for calculating liquid junction potential corrections in  
5 patch-clamp, intracellular, epithelial and bilayer measurements and for correcting junction  
6 potential measurements. *J Neurosci Methods* **51**:107–16.
- 7 Chung K, Deisseroth K. 2013. CLARITY for mapping the nervous system. *Nat Methods* **10**:508–  
8 13. doi:10.1038/nMeth.2481
- 9 Chung K, Wallace JL, Kim S-Y, Kalyanasundaram S, Andalman AS, Davidson TJ, Mirzabekov JJ,  
10 Zalocusky KA, Mattis J, Denisin AK, Pak S, Bernstein H, Ramakrishnan C, Grosenick L,  
11 Gradinaru V, Deisseroth K. 2013. Structural and molecular interrogation of intact biological  
12 systems. *Nature* **497**:332–337. doi:10.1038/nature12107
- 13 Clermont Y. 1958. Contractile elements in the limiting membrane of the seminiferous tubules of  
14 the rat. *Exp Cell Res* **15**:438–440. doi:10.1016/0014-4827(58)90052-1
- 15 Coddou C, Yan Z, Obsil T, Huidobro-Toro JP, Stojilkovic SS. 2011. Activation and Regulation of  
16 Purinergic P2X Receptor Channels. *Pharmacol Rev* **63**:641–683.  
17 doi:10.1124/pr.110.003129.641
- 18 Cross BA. 1958. Hypothalamic Influences on Sperm Transport in the Male and Female Genital  
19 Tract In: Lloyd CW, editor. Recent Progress In the Endocrinology of Reproduction. New York,  
20 NY, USA: Academic Press, New York. pp. 167–176.
- 21 Ellis LC, Buhrlay LE, Hargrove JL. 1978. Species differences in contractility of seminiferous  
22 tubules and tunica albuginea as related to sperm transport through the testis. *Syst Biol*  
23 *Reprod Med* **1**:139–146. doi:10.3109/01485017808988330
- 24 Ellis LC, Farr GCH, Tesi RJ, Groesbeck MD, Farr CH, Tesi RJ. 1981. Contractility of seminiferous  
25 tubules as related to sperm transport in the Male. *Syst Biol Reprod Med* **6**:283–294.  
26 doi:10.3109/01485018108987539
- 27 Evangelidis G. 2013. lat: A matlab toolbox for image alignment.  
28 [sites.google.com/site/imagealignment](https://sites.google.com/site/imagealignment).  
29 <https://sites.google.com/site/imagealignment/download>
- 30 Filippini A, Tripiciano A, Palombi F, Teti A, Paniccia R, Stefanini M, Ziparo E. 1993. Rat testicular

- 1 myoid cells respond to endothelin: Characterization of binding and signal transduction  
2 pathway. *Endocrinology* **133**:1789–1796. doi:10.1210/endo.133.4.8404621
- 3 Fleck D, Mundt N, Bruentgens F, Geilenkirchen P, Machado PA, Veitinger T, Veitinger S,  
4 Lipartowski SM, Engelhardt CH, Oldiges M, Spehr J, Spehr M. 2016. Distinct purinergic  
5 signaling pathways in prepubescent mouse spermatogonia. *J Gen Physiol* **148**:253–271.  
6 doi:10.1085/jgp.201611636
- 7 Foresta C, Rossato M, Bordon P, Di Virgilio F. 1995. Extracellular ATP activates different  
8 signalling pathways in rat Sertoli cells. *Biochem J* **311** ( Pt 1):269–74.
- 9 Gelain DP, Casali EA, De Oliveira RB, De Souza LF, Barreto F, Dal-Pizzol F, Moreira Fonseca  
10 JC. 2005. Effects of follicle-stimulating hormone and vitamin A upon purinergic secretion by  
11 rat Sertoli cells. *Mol Cell Biochem* **278**:185–194.
- 12 Gelain DP, de Souza LF, Bernard EA. 2003. Extracellular purines from cells of seminiferous  
13 tubules. *Mol Cell Biochem* **245**:1–9.
- 14 Gretenkord S, Kostka JK, Hartung H, Watznauer K, Fleck D, Minier-Toribio A, Spehr M, Hanganu-  
15 Opatz IL. 2019. Coordinated electrical activity in the olfactory bulb gates the oscillatory  
16 entrainment of entorhinal networks in neonatal mice. *PLOS Biol* **17**:e2006994.  
17 doi:10.1145/2512328
- 18 Hargrove JL, Seeley RR, Ellis LC. 1975. Rabbit testicular contractions: bimodal interaction of  
19 prostaglandin E1 with other agonists. *Am J Physiol* **228**:810–814.  
20 doi:10.1152/ajplegacy.1975.228.3.810
- 21 Harris GC, Nicholson HD. 1998. Stage-related differences in rat seminiferous tubule contractility  
22 in vitro and their response to oxytocin. *J Endocrinol* **157**:251–257. doi:10.1677/joe.0.1570251
- 23 Hess RA, De Franca LR. 2008. Spermatogenesis and cycle of the seminiferous epithelium In:  
24 Cheng CY, editor. *Molecular Mechanisms in Spermatogenesis*. Springer Science+Business  
25 Media. pp. 1–15. doi:10.1007/978-0-387-09597-4\_1
- 26 Holdcraft RW, Braun RE. 2004. Androgen receptor function is required in Sertoli cells for the  
27 terminal differentiation of haploid spermatids. *Development* **131**:459–467.  
28 doi:10.1242/dev.00957
- 29 Hovatta O. 1972. Contractility and structure of adult rat seminiferous tubules in organ culture.  
30 *Zeitschrift für Zellforsch und mikroskopische Anat* **130**:171–179. doi:10.1007/BF00306955

- 1 Liu C, Yuen J, Torralba A. 2015. Sift flow: Dense correspondence across scenes and its  
2 applications. *Dense Image Corresp Comput Vis* 15–49. doi:10.1007/978-3-319-23048-1\_2
- 3 Losinno AD, Morales A, Fernández D, Lopez LA. 2012. Peritubular Myoid Cells from Rat  
4 Seminiferous Tubules Contain Actin and Myosin Filaments Distributed in Two Independent  
5 Layers1. *Biol Reprod* **86**:1–8. doi:10.1095/biolreprod.111.095158
- 6 Madisen L, Garner AR, Shimaoka D, Chuong AS, Klapoetke NC, Li L, van der Bourg A, Niino Y,  
7 Egolf L, Monetti C, Gu H, Mills M, Cheng A, Tasic B, Nguyen TN, Sunkin SM, Benucci A,  
8 Nagy A, Miyawaki A, Helmchen F, Empson RM, Knöpfel T, Boyden ES, Reid RC, Carandini  
9 M, Zeng H. 2015. Transgenic Mice for Intersectional Targeting of Neural Sensors and  
10 Effectors with High Specificity and Performance. *Neuron* **85**:942–958.  
11 doi:10.1016/j.neuron.2015.02.022
- 12 Madisen L, Zwingman TA, Sunkin SM, Oh SW, Zariwala HA, Gu H, Ng LL, Palmiter RD, Hawrylycz  
13 MJ, Jones AR, Lein ES, Zeng H. 2010. A robust and high-throughput Cre reporting and  
14 characterization system for the whole mouse brain. *Nat Neurosci* **13**:133–140.  
15 doi:10.1038/nn.2467
- 16 Mayerhofer A. 2013. Human testicular peritubular cells: More than meets the eye. *Reproduction*  
17 **145**. doi:10.1530/REP-12-0497
- 18 Miura K, Rueden C, Hiner M, Schindelin J, Rietdorf J. 2014. ImageJ Plugin CorrectBleach V2.0.2.  
19 doi:10.5281/ZENODO.30769
- 20 Miyake K, Yamamoto MM, Narita H, Hashimoto J, Mitsuya H. 1986. Evidence for contractility of  
21 the human seminiferous tubule confirmed by its response to noradrenaline and acetylcholine.  
22 *Fertil Steril* **46**:734–737. doi:10.1016/S0015-0282(16)49663-9
- 23 Parvinen M. 1982. Regulation of the Seminiferous Epithelium. *Endocr Rev* **3**:404–417.  
24 doi:10.1210/edrv-3-4-404
- 25 Pickering BT, Birkett SD, Guldenaar SE, Nicholson HD, Worley RT, Yavachev L. 1989. Oxytocin  
26 in the testis: what, where, and why? *Ann N Y Acad Sci* **564**:198–209.
- 27 Poletto Chaves LA, Piva Pontelli E, Varanda WA. 2006. P2X receptors in mouse Leydig cells. *Am*  
28 *J Physiol Cell Physiol* **290**:1009–1017. doi:10.1152/ajpcell.00506.2005.
- 29 Romano F, Tripiciano A, Muciaccia B, De Cesaris P, Ziparo E, Palombi F, Filippini A. 2005. The  
30 contractile phenotype of peritubular smooth muscle cells is locally controlled: Possible

- 1           implications           in           male           fertility.           *Contraception*           **72**:294–297.  
2           doi:10.1016/j.contraception.2005.03.009
- 3       Roosen-Runge EC. 1951. Motions of the seminiferous tubules of rat and dog. *Anat Rec* **109**:413.
- 4       Ross MH. 1967. The fine structure and development of the peritubular contractile cell component  
5           in the seminiferous tubules of the mouse. *Am J Anat* **121**:523–557.  
6           doi:10.1002/aja.1001210307
- 7       Rueden CT, Schindelin J, Hiner MC, DeZonia BE, Walter AE, Arena ET, Eliceiri KW. 2017.  
8           ImageJ2: ImageJ for the next generation of scientific image data. *BMC Bioinformatics* **18**:529.  
9           doi:10.1186/s12859-017-1934-z
- 10       Russell LD. 1990. Histological and Histopathological Evaluation of the Testis. Vienna: Cache River  
11           Press.
- 12       Schindelin J, Arganda-Carreras I, Frise E, Kaynig V, Longair M, Pietzsch T, Preibisch S, Rueden  
13           C, Saalfeld S, Schmid B, Tinevez J-YY, White DJ, Hartenstein V, Eliceiri KW, Tomancak P,  
14           Cardona A. 2012. Fiji: An open-source platform for biological-image analysis. *Nat Methods*  
15           **9**:676–682. doi:10.1038/nmeth.2019
- 16       Schlatt S, Ehmcke J. 2014. Regulation of spermatogenesis: an evolutionary biologist's  
17           perspective. *Semin Cell Dev Biol* **29**:2–16. doi:10.1016/j.semcdb.2014.03.007
- 18       Seidler NW, Jona I, Vegh M, Martonosi A. 1989. Cyclopiazonic acid is a specific inhibitor of the  
19           Ca<sup>2+</sup>-ATPase of sarcoplasmic reticulum. *J Biol Chem* **264**:17816–17823.
- 20       Setchell BP, Davies R V, Gladwell DRT, Main SJ, Pilsworth L, Waites GMH. 1978. The movement  
21           of fluid in the seminiferous tubules and rete testis. *Ann Biol anim Bioch Biophys* **18**:623–632.
- 22       Suvanto O, Kormano M. 1970. The relationship between in vitro contractions of the rat  
23           seminiferous tubules and the cyclic stage of the seminiferous epithelium. *J Reprod Fertil*  
24           **21**:227–232. doi:10.1530/jrf.0.0210227
- 25       Tripiciano A, Filippini A, Giustiniani Q, Palombi F. 1996. Direct Visualization of Rat Peritubular  
26           Myoid Cell Contraction in Response to Endothelin1. *Biol Reprod* **55**:25–31.  
27           doi:10.1095/biolreprod55.1.25
- 28       Tung PS, Fritz IB. 1990. Characterization of Rat Testicular Peritubular Myoid Cells in Culture:  $\alpha$ -  
29           Smooth Muscle Isoactin is a Specific Differentiation Marker. *Biol Reprod* **42**:351–365.  
30           doi:10.1095/biolreprod42.2.351



- 1 Tung PS, Fritz IB. 1987. Morphogenetic restructuring and formation of basement membranes by  
2 Sertoli cells and testis peritubular cells in co-culture: Inhibition of the morphogenetic cascade  
3 by cyclic AMP derivatives and by blocking direct cell contact. *Dev Biol* **120**:139–153.  
4 doi:10.1016/0012-1606(87)90112-6
- 5 Veitinger S, Veitinger T, Cainarca S, Fluegge D, Engelhardt CH, Lohmer S, Hatt H, Corazza S,  
6 Spehr J, Neuhaus EM, Spehr M. 2011a. Purinergic signalling mobilizes mitochondrial Ca<sup>2+</sup>  
7 in mouse Sertoli cells. *J Physiol* **589**:5033–5055. doi:10.1113/jphysiol.2011.216309
- 8 Veitinger S, Veitinger T, Cainarca S, Fluegge D, Engelhardt CH, Lohmer S, Hatt H, Corazza S,  
9 Spehr J, Neuhaus EM, Spehr M. 2011b. Purinergic Signaling Mobilizes Mitochondrial Ca<sup>2+</sup>  
10 in Mouse Sertoli Cells. *J Physiol* **49**. doi:10.1113/jphysiol.2011.216309
- 11 Walenta L, Fleck D, Fröhlich T, von Eysmond H, Arnold GJ, Spehr J, Schwarzer JU, Köhn F-MM,  
12 Spehr M, Mayerhofer A. 2018. ATP-mediated Events in Peritubular Cells Contribute to Sterile  
13 Testicular Inflammation. *Sci Rep* **8**:1431. doi:10.1038/s41598-018-19624-3
- 14 Wirth A, Benyó Z, Lukasova M, Leutgeb B, Wettschureck N, Gorbey S, Orsy P, Horváth B, Maser-  
15 Gluth C, Greiner E, Lemmer B, Schütz G, Gutkind S, Offermanns S. 2008. G12-G13-LARG-  
16 mediated signaling in vascular smooth muscle is required for salt-induced hypertension. *Nat*  
17 *Med* **14**:64–68. doi:10.1038/nm1666
- 18 Worley RTS, Leendertz JA. 1988. A videomicrographic low-frequency movement analyser (VLMA)  
19 and perfusion chamber for recording and analysis of the physical behaviour of seminiferous  
20 tubules and other contractile tissues in vitro. *J Microsc* **151**:61–69.  
21 doi:10.1164/rccm.2301004
- 22 Worley RTS, Nicholson HD, Pickering BT. 1985. Testicular oxytocin: an initiator of seminiferous  
23 tubule movement? *Recent Progress in Cellular Endocrinology of the Testis*. pp. 205–212.

## 24 Additional files / information

### 25 Figure Supplements

- 26 • Figure 1 – figure supplement 1
- 27 • Figure 4 – figure supplement 1

- 1           • Figure 7 – figure supplement 1
- 2           • Figure 7 – figure supplement 2

3

4           **Captions for Movies S1 to S8**

5

6           **Supplementary files**

7           Transparent reporting form

8

9           **Other Rich Media Files for this manuscript include the following:**

10          Movies S1 to S8

11

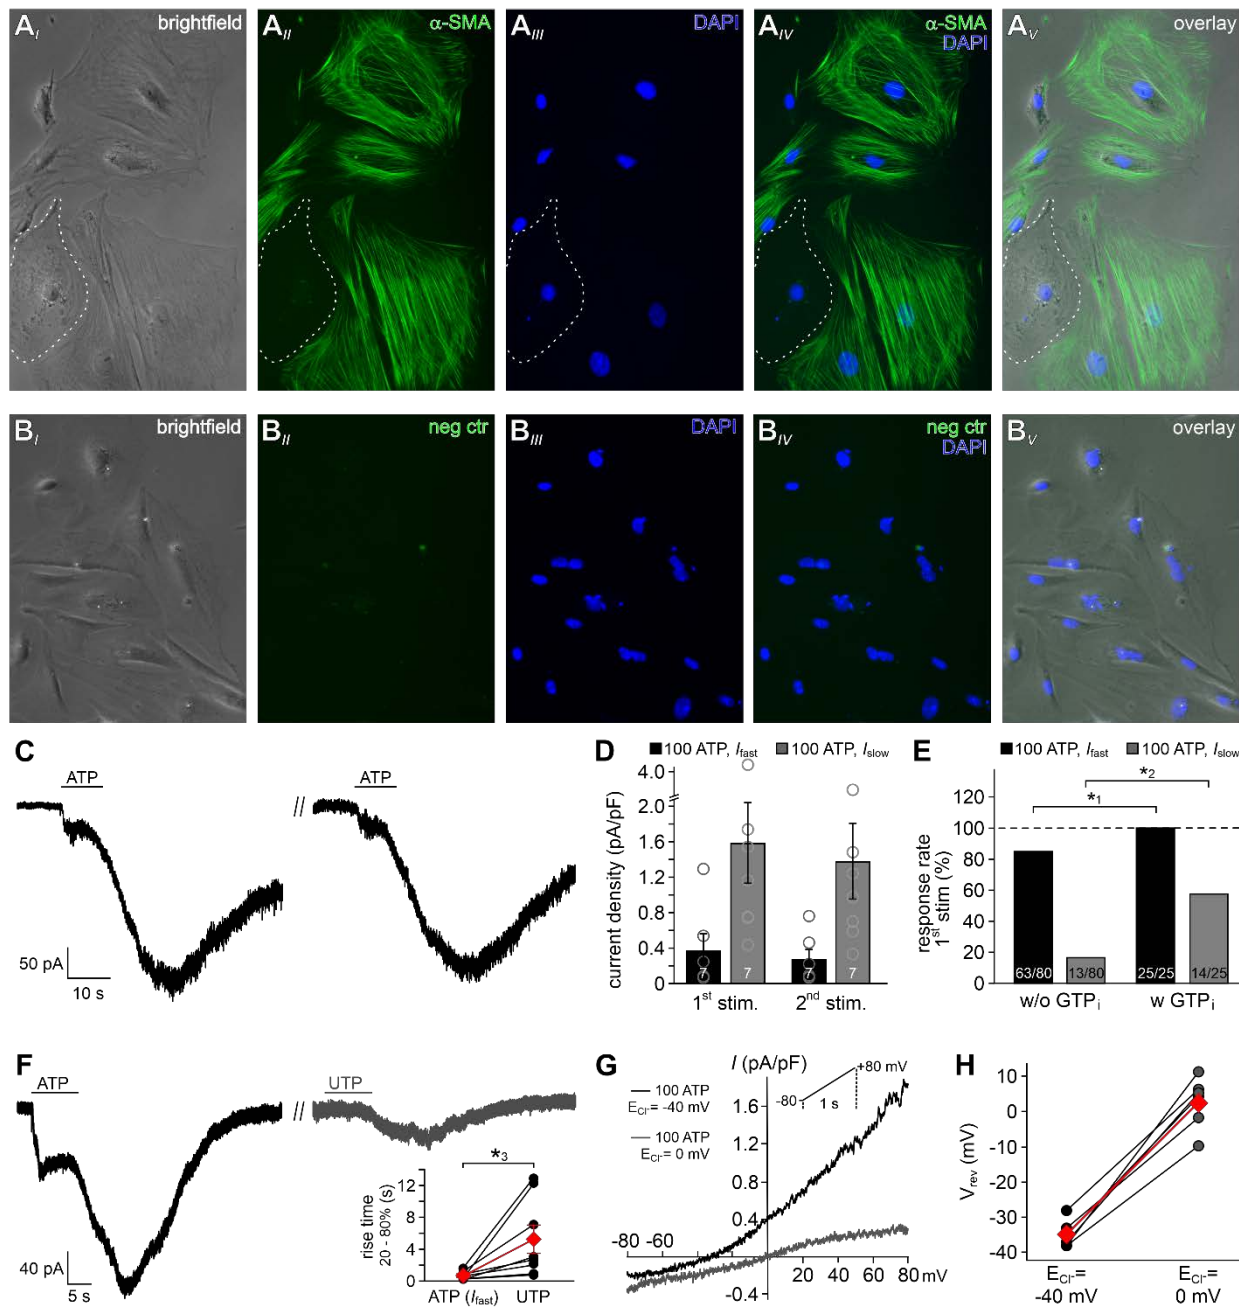

1  
2  
3  
4  
5  
6  
7  
8  
9  
10

**Figure 1 – figure supplement 1: Mouse TPCs in primary culture display two distinct currents in response to extracellular ATP.** (A) Representative phase contrast ( $A_i$ ) and epi-fluorescence images of TPCs *in vitro*. The vast majority of cultured cells are immunopositive for the TPC marker  $\alpha$ -smooth muscle actin ( $\alpha$ -SMA; green ( $A_{ii}$ )). The dotted white line delimits one of the few  $\alpha$ -SMA-negative cells. Cell count was based on nuclear staining (DAPI, blue ( $A_{iii}$ )). Merged images ( $A_{iv-v}$ ) allow categorization. (B) Corresponding control images taken after the primary  $\alpha$ -SMA antibody was omitted. (C) Representative whole-cell voltage-clamp recordings ( $V_{hold} = -80$  mV) of ATP-induced inward currents in cultured mouse TPCs. Two components – a fast relatively small current and a delayed lasting current – are triggered

repeatedly by successive ATP exposure (100  $\mu$ M; 90 s inter-stimulus interval). Notably, we never observed a delayed slow current without a fast response. **(D)** Bar chart quantifying peak densities (mean  $\pm$  SEM, circles show individual values) of the fast ( $I_{fast}$ ; black) and the delayed ( $I_{slow}$ ; grey) ATP-induced current components (1<sup>st</sup> stimulation:  $I_{fast}$   $0.37 \pm 0.2$  pA/pF;  $I_{slow}$   $1.58 \pm 0.5$  pA/pF; 2<sup>nd</sup> stimulation  $I_{fast}$   $0.27 \pm 0.1$  pA/pF;  $I_{slow}$   $1.37 \pm 0.4$  pA/pF). **(E)** Bar graph illustrating the frequency of  $I_{fast}$  (black) and  $I_{slow}$  (grey) occurrence upon ATP (100  $\mu$ M) stimulation in absence (w/o) and presence (w) of GTP (500  $\mu$ M) in the pipette solution, respectively. Asterisks denote statistically significant differences ( $*^1p = 0.008$ ,  $*^2p = 0.0003$ ; Fisher's exact test); n as indicated in bars. **(F)** Representative whole-cell voltage-clamp recordings ( $V_{hold} = -80$  mV) of inward currents induced by ATP (100  $\mu$ M) and UTP (100  $\mu$ M), respectively. Whenever ATP triggers both  $I_{fast}$  and  $I_{slow}$  (left),  $I_{slow}$  is also induced by UTP (right). UTP-dependent currents develop significantly slower than ATP-evoked  $I_{fast}$  (inset;  $*^3p = 0.03$ ; paired *t*-test). **(G, H)** When measured during peak  $I_{slow}$ , short (200 ms) voltage ramp (-80 to 80 mV) recordings reveal current-voltage relationships of ATP-induced currents at different Cl<sup>-</sup> equilibrium potential ( $E_{Cl}$ ; -40 mV (**S<sub>1</sub>** / **S<sub>7</sub>**; black trace) or 0 mV (**S<sub>5</sub>** / **S<sub>7</sub>**; grey trace) (**G**). Note the corresponding shift in reversal potential ( $V_{rev}$ ) that is quantified in (**H**) (n = 6). Black / grey dots represent measurements from individual cells, red diamonds depict mean values.

**Figure 4 – figure supplement 1:**

**Purinergic stimulation mediates contractions in cultured human TPCs.**

**(A)** Phase contrast micrographs of human TPC in primary culture (Walenta *et al.*, 2018) that were monitored (50 min) under either control conditions (left) or during treatment with ATP (right; 1 mM). White arrow heads

denote regions where a substantial reduction in cell surface area upon ATP exposure becomes readily apparent. **(B)** Some TPCs already 'shrink' within 30 s of treatment. Cell contour is indicated before (dashed white line) and during (solid red line) ATP exposure (red 'shadow' illustrates the putative contraction). **(C, D)** 24 h collagen gel contraction assays (Ailenberg *et al.*, 1990; Tung and Fritz, 1987) allow quantification of human TPC contractility *in vitro*. As exemplified in **(C)** and quantified in **(D)** ATP (1 mM) incubation of human TPCs that are embedded in collagen lattices mediates a massive reduction in gel area (red bar;  $25.5 \pm 7.0\%$ , mean  $\pm$  SEM; human TPCs from n = 3 patients, measured in duplicates). By contrast, gel size remains essentially unchanged under control conditions (black bar). Asterisk denotes statistical significance ( $p = 0.003$ ; unpaired *t*-test).

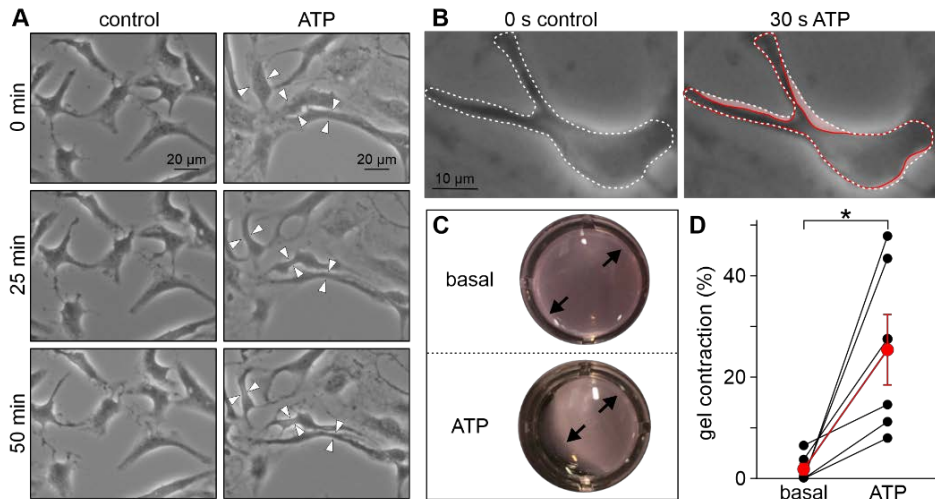

1 **Figure 7 – figure supplement 1: A custom-built**  
2 **3D printed microscope stage enables**  
3 **simultaneous *in vivo* multiphoton imaging of**  
4 **Ca<sup>2+</sup> signals and contractions in mouse**  
5 **seminiferous tubules. (A)** Schematic drawing that  
6 illustrates the custom-built intravital imaging stage  
7 designed for *in vivo* recordings testicular activity.  
8 Three different views depict design details from  
9 different perspectives. A top view of the apparatus  
10 (**A<sub>i</sub>**) shows that several adjustable clamps allow  
11 exact positioning of the anaesthetized animal on a  
12 heated plate equipped for online vital sign  
13 monitoring. After centring one testicle in a heated  
14 (35°C) and saline-filled recording chamber (**A<sub>ii</sub>**)  
15 within the microscope's optical axis, a large working  
16 distance (~3 mm) infrared-optimized water-  
17 immersion objective (25x; 0.95 NA) enables  
18 multiphoton deep tissue imaging. For clarity,  
19 additional tubing that allows rapid exchange of  
20 oxygenated solution during experiments has been  
21 omitted. A close-up cartoon of the recording  
22 chamber (**A<sub>iii</sub>**) illustrates that two micromanipulator-  
23 based moveable organ clamps enable precise  
24 (re)positioning of the testis as well as effective  
25 movement cancellation. Note that the *vas deferens*  
26 and internal spermatic arteries are kept intact to  
27 assure blood supply and fluid transport.  
28

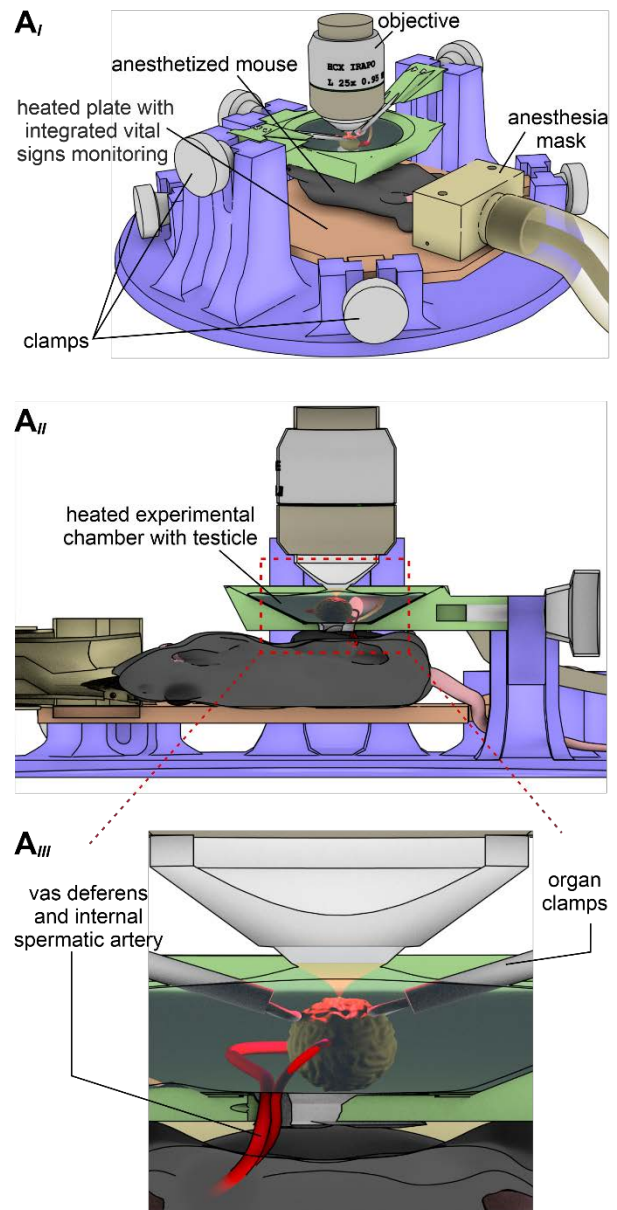

**Figure 7 – figure supplement 2: *In vivo* imaging of tubular activity in SMMHC-CreER<sup>T2</sup> x Ai95D mice. (A–C)**

Quantitative analysis of spontaneous seminiferous tubule contractions *in vivo*. Dot plots depict (A) the number of contractions observed in a given tubule segment during 10 min windows of observation, and (B) the intervals between two consecutive contractions. Note that two distinct types of either relatively short (<80 s; red;  $38 \pm 21$  s; mean  $\pm$  SD) and long (>2 min; magenta;  $403 \pm 250$  s; mean  $\pm$  SD) intervals become apparent. Moreover, we never observed tubules that lacked contractions. (C) 2D dot plot shows positive correlation (Pearson correlation coefficient  $r = 0.71$ ) between TPC Ca<sup>2+</sup> signal durations (full duration at half-maximum; FDHM) and corresponding tubule contractions. (D) Example experiment that controls for pressure-dependent signal artifacts when seminiferous tubules are exposed to ‘puffs’ of solution. Three fluorescence images show outlines of three seminiferous tubule segments (white dotted lines) at different time points ( $t_0 - t_2$ ). Aside the addition of a red fluorescent dye to the solution in the pipette, compositions of bath and pipette solution match. Note that puffs of stained solution ( $t_1$  &  $t_2$ ) cause neither contractions, nor Ca<sup>2+</sup> signals.

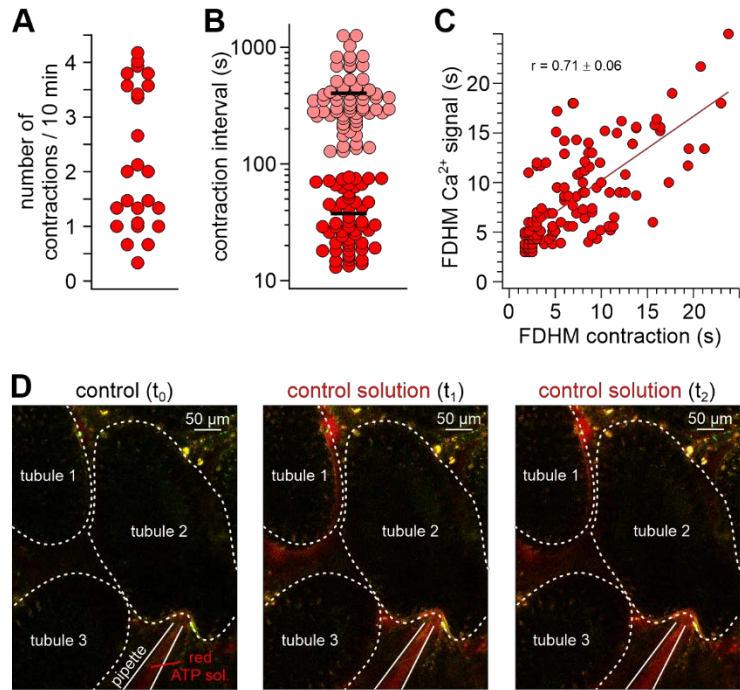

**Movie S1: SMMHC-CreER<sup>T2</sup> mice allow inducible TPC-specific expression of genetically encoded fluorescent reporter proteins.** After tamoxifen injections, SMMHC-CreER<sup>T2</sup> x Ai14D male offspring express tdTomato (red) in both TPCs and vascular smooth muscle cells. Movie shows the 3D reconstruction of an intact and cleared (CLARITY (Chung and Deisseroth, 2013)) 6 x 3 x 1.5 mm testis sample with nuclei labelled by DRAQ5 (blue).

**Movie S2: Quasi-simultaneous recording of peritubular Ca<sup>2+</sup> signals and seminiferous tubule movement.** A representative seminiferous tubule section (250  $\mu$ m) is stimulated with ATP (100  $\mu$ M, 10 s). After fura-2 bulk loading, ratiometric fluorescence imaging ( $f_{340}/f_{380}$ ) reveals relative changes in Ca<sup>2+</sup> concentration (rainbow colour map; blue, low Ca<sup>2+</sup>; red, high Ca<sup>2+</sup>) in a peripheral

1 band of putative TPCs at the tubule's edge. Since each image acquisition cycle (1 Hz) captures  
2 two fluorescence ( $Ex\lambda_{340}$ ;  $Ex\lambda_{380}$ ) and one reflective light image (brightfield), time-lapse recordings  
3 allow parallel physiological phenotyping of both seminiferous tubule  $Ca^{2+}$  responses and  
4 movement (shown sequentially for clarity).

5  
6 **Movie S3: Both ATP-induced seminiferous tubule  $Ca^{2+}$  responses and contractions are**  
7 **dose-dependent.** A representative seminiferous tubule section (250  $\mu$ m; fura-2 bulk loading) is  
8 stimulated with increasing ATP concentrations (1–1000  $\mu$ M, 10 s). Ratiometric fluorescence  
9 imaging ( $f_{340}/f_{380}$ ) reveals relative changes in  $Ca^{2+}$  concentration (rainbow colour map; blue, low  
10  $Ca^{2+}$ ; red, high  $Ca^{2+}$ ) in putative TPCs. Quasi-simultaneous time-lapse recording of fluorescence  
11 ( $Ex\lambda_{340}$ ;  $Ex\lambda_{380}$ ) and brightfield (reflective light) images illustrates that both seminiferous tubule  
12  $Ca^{2+}$  signals and contractions (shown sequentially for clarity) are dose-dependent and share an  
13 ATP threshold concentration of approximately 1  $\mu$ M.

14  
15 **Movie S4: ATP stimulation triggers movement of luminal content in intact seminiferous**  
16 **tubules.** Brightfield time-lapse recording of an intact isolated seminiferous tubule (field of view  
17 shows cycle stages II and III) challenged by brief focal ATP perfusion (100  $\mu$ M, 10 s). The spatial  
18 extent of the stimulation zone had been defined by prior perfusion with a dye solution (food color).

19  
20 **Movie S5: ATP stimulation triggers transient  $Ca^{2+}$  signals in TPCs of intact seminiferous**  
21 **tubules.** Fluorescence time-lapse recording of an intact seminiferous tubule (field of view shows  
22 cycle stage II) isolated from a mouse selectively expressing GCaMP6f in TPS (SMMHC-CreER<sup>T2</sup>  
23 x Ai95D male offspring). Fluorescence imaging ( $\Delta F/F$ ) during brief focal ATP perfusion (100  $\mu$ M,  
24 10 s) – the spatial extent of the stimulation zone had been defined by prior perfusion with a dye  
25 solution (food color) – reveals relative changes in TPC  $Ca^{2+}$  concentration (rainbow colour map;  
26 blue, low  $Ca^{2+}$ ; red, high  $Ca^{2+}$ ).

27  
28 **Movie S6: *In vivo* multiphoton microscopy demonstrates spontaneous  $Ca^{2+}$  signals in**  
29 **mouse TPCs.** Spontaneous seminiferous tubule *in vivo* activity monitored in SMMHC-CreER<sup>T2</sup> x  
30 Ai95D mice. Intravital multiphoton fluorescence time-lapse imaging ( $\Delta F/F$ , 2 Hz) reveals

1 coordinated changes in TPC  $\text{Ca}^{2+}$  concentration (rainbow colour map; blue, low  $\text{Ca}^{2+}$ ; red, high  
2  $\text{Ca}^{2+}$ ) among one of three seminiferous tubules in the field of view ( $591 \mu\text{m} \times 591 \mu\text{m}$ ).

3  
4 **Movie S7: Coordinated contractile movements ensure luminal sperm transport *in vivo*.**

5 Intravital *en-face* brightfield imaging illustrates spontaneous contractions and luminal movement  
6 in seminiferous tubules of adult mice. Low ( $1.5 \text{ mm} \times 1.4 \text{ mm}$  field of view) and high-magnification  
7 time-lapse recordings reveal that contractions and luminal content propulsion are routinely  
8 observed *in vivo*. Note the unobstructed blood flow within testicular vessels.

9  
10 **Movie S8: Focal ATP stimulation triggers peritubular  $\text{Ca}^{2+}$  signals and seminiferous tubule**

11 **contractions *in vivo*.** Intravital multiphoton fluorescence time-lapse imaging in SMMHC-CreER<sup>T2</sup>  
12 x Ai95D mice. Overlay of two detection channels ( $\Delta\text{F}/\text{F}$ , GCaMP6f, green; Alexa Fluor 555, red).  
13 Stimulus solution (containing Alexa Fluor 555 ( $4 \mu\text{M}$ ) and ATP ( $1 \text{ mM}$ )) is puffed from a glass  
14 micropipette, which penetrated the *tunica albuginea* to target the interstitial space. Changes in  
15 TPC  $\text{Ca}^{2+}$  concentration are color-coded (black, low  $\text{Ca}^{2+}$ ; green, high  $\text{Ca}^{2+}$ ). Note that typically  
16 such contractions /  $\text{Ca}^{2+}$  signals do not occur when ATP is omitted from the ‘puff’ solution (data  
17 not shown).
